# Supplementary material for: Micelle promoted supramolecular carbohydrate scaffold-catalyzed multicomponent synthesis of 1,2-dihydro-1-aryl-3H-naphth[1,2-e][1,3]oxazin-3-one and amidoalkyl naphthols derivatives in aqueous medium
Source: Royal Society of Chemistry journal article supplement (doi:10.1039/c2ra20848b), 2012-01-01

## Supporting Information

### **Micelle promoted supramolecular carbohydrate scaffold-catalyzed multicomponent synthesis of 1,2-dihydro-1-aryl-3H-naphtho[1,2-e][1,3]oxazin-3-one and amidoalkyl naphthols derivatives in aqueous medium**

#### **General Considerations.**

1. Reagent grade solvents were used for extraction and flash chromatography. All the reagents and chemicals were purchased from Sigma–Aldrich Chemical Co, Lancaster and were used directly without further purification. Whereas starch and cellulose were purchased from Merck. The progress of reactions was checked by analytical thin-layer chromatography (TLC, Merck silica gel 60 F-254 plates). The plates were visualized first with UV illumination followed by iodine. Flash column chromatography was performed using silica gel (230-400 mesh). The solvent compositions reported for all chromatographic separations are on a volume/volume (v/v) basis. <sup>1</sup>H-NMR spectra were recorded at 200 MHz and are reported in parts per million (ppm) on the  $\delta$  scale relative to tetramethylsilane as an internal standard. <sup>13</sup>C-NMR spectra were recorded at 50 MHz and are reported in parts per million (ppm) on the  $\delta$  scale relative to CDCl<sub>3</sub>+ DMSO-d<sub>6</sub>/DMSO-d<sub>6</sub> (40.0). Mass spectra were obtained using JEOL SX-102 (ESI) instrument. Melting points were determined on a Mel Temp II melting point apparatus and are uncorrected.
2. **Preparation of cellulose or starch sulfuric acid:** To a magnetically stirred mixture of 5.0 g of starch (Merck) or 5.0 g of cellulose (DEAE for column chromatography, Merck) in 20 ml of n-hexane, 1.0 g of chlorosulfonic acid (9 mmol) was added dropwise at 0°C over 2 h. HCl gas escaped from the reaction vessel immediately. After the addition was complete, the mixture was stirred for 2 h. After that, the mixture was filtered and washed with 30 ml of acetonitrile (2 times), and dried under vacuum at room temperature to obtain 5.47 g cellulose sulfuric acid (CellSA) as white powder or 5.06 g starch sulfuric acid (StarSA) as cream powder.
3. **General procedure for the synthesis of compound (4).** In a typical experiment, the aldehyde (2 mmol), urea/thiourea/amide (3.0 mmol), ( $\alpha$ , or  $\beta$ ) naphthol (2 mmol), cellulose sulfuric acid (0.05 g), and SDS (20 mol %) were taken in 5 mL water. the reaction mixture was vigorous stirred at 80 °C till the completion of the reaction (monitored by TLC). After completion the reaction mixture was extracted with ethyl acetate and filtered the solid catalyst for reused and the organic phase dried over sodium sulphate and evaporated under vacuum to give crude product, which was purified either by column chromatography using ethyl acetate:hexane (silica gel, 230-400 mesh) as an eluent or by recrystallization from ethanol to afford the corresponding product.

#### **1-phenyl-1H-naphtho[1,2-e][1,3]oxazin-3(2H)-one (4a).**

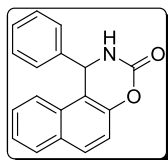

**White solid; mp: 219-222<sup>o</sup>C; <sup>1</sup>H NMR (200 MHz, DMSO-d<sub>6</sub>)  $\delta$  6.21 (d, 1H,  $J$  = 4.5 Hz), 7.12 (d, 1H,  $J$  = 7.86 Hz), 7.23-7.38 (m, 7H), 7.61 (d, 1H,  $J$  = 8.6 Hz), 7.69-7.74 (m, 1H), 8.05-8.10 (m, 1H), 8.94 (br, s, 1H), <sup>13</sup>C NMR (50 MHz, DMSO-d<sub>6</sub>): 155.05, 149.15, 142.86, 132.03, 131.46, 128.73, 128.13, 127.33, 127.18, 127.03, 126.60, 125.78, 125.69, 119.77,**

115.82, 53.66; ESIMS:  $m/z$  276 (M+H); IR (KBr): 3323, 1711, 1452.  $753\text{ cm}^{-1}$ ; Analysis calculated for  $\text{C}_{18}\text{H}_{13}\text{NO}_2$ : C, 78.53; H, 4.76; N, 5.09; found: C, 78.62; H, 4.69; N, 5.01 %.

**1-(4-methoxyphenyl)-1H-naphtho[1,2-e][1,3]oxazin-3(2H)-one (4b).**

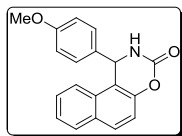

**White solid; mp: 185-187<sup>o</sup>C; <sup>1</sup>H NMR (200 MHz, DMSO-*d*<sub>6</sub>)**  $\delta$  3.70 (s, 3H), 6.15 (d, 1H,  $J= 4.7$  Hz), 6.90 (d, 2H,  $J= 7.95$  Hz), 7.10-7.21 (m, 3H), 7.37-7.44 (m, 2H), 7.63 (d, 1H,  $J= 8.25$  Hz), 7.72-7.76 (m, 1H), 8.07-8.12 (m, 1H) 8.53 (br, s, 1H); **<sup>13</sup>C NMR (50 MHz, DMSO-*d*<sub>6</sub>):** 158.50, 155.05, 149.15, 132.62, 132.03, 131.46, 129.08, 127.33, 127.03, 126.60, 125.78, 125.69, 119.77, 115.82, 113.63, 56.04, 53.66.; ESIMS:  $m/z$  306 (M+H); IR(KBr): 3334, 1705, 1437, 749  $\text{cm}^{-1}$ ; Analysis calculated for  $\text{C}_{19}\text{H}_{15}\text{NO}_3$ : C, 74.74; H, 4.95; N, 4.59 ; found: C, 74.81; H, 4.84; N, 4.63 %.

**1-(4-chlorophenyl)-1H-naphtho[1,2-e][1,3]oxazin-3(2H)-one (4c).**

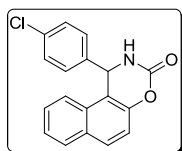

**White solid; mp: 209-212<sup>o</sup>C; <sup>1</sup>H NMR (200 MHz, DMSO-*d*<sub>6</sub>)**  $\delta$  5.97 (d, 1H,  $J= 4.17$  Hz), 6.88 (d, 1H,  $J= 8.9$  Hz), 7.04-7.15 (m, 6H), 7.37 (d, 1H,  $J= 7.4$  Hz), 7.46-7.50 (m, 1H), 7.81-7.86 (m, 1H), 9.05 (br, s, 1H); **<sup>13</sup>C NMR (50 MHz, DMSO-*d*<sub>6</sub>):** 155.05, 149.15, 140.56, 133.31, 132.03, 131.46, 129.86, 129.11, 127.33, 127.03, 126.60, 125.78, 125.69, 119.77, 115.82, 53.66; ESIMS:  $m/z$  310 (M+H); IR (KBr): 3330, 1708, 1448, 747  $\text{cm}^{-1}$ ; Analysis calculated for  $\text{C}_{18}\text{H}_{12}\text{ClNO}_2$ : C, 69.80; H, 3.90; N, 4.52 ; found: C, 69.91; H, 3.86; N, 4.64 %.

**1-(2,4-dichlorophenyl)-1H-naphtho[1,2-e][1,3]oxazin-3(2H)-one (4d).**

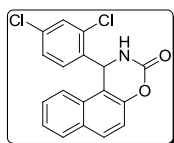

**White solid; mp: 214-217<sup>o</sup>C; <sup>1</sup>H NMR (200 MHz, DMSO-*d*<sub>6</sub>)**  $\delta$  6.09 (d, 1H,  $J= 4.9$  Hz), 6.76-6.90 (m, 3H), 6.95-7.10 (m, 2H), 7.21-7.23 (m, 1H), 7.29-7.42 (m, 2H), 7.84-7.89 (m, 1H), 9.23 (br, s, 1H); **<sup>13</sup>C NMR (50 MHz, DMSO-*d*<sub>6</sub>):** 155.09, 148.54, 138.04, 136.11, 135.08, 132.03, 131.46, 130.57, 127.80, 127.33, 127.03, 126.60, 126.30, 125.69, 119.34, 114.65, 49.28; ESIMS:  $m/z$  355 (M+H); IR(KBr): 3329, 1715, 1442, 755  $\text{cm}^{-1}$ ; Analysis calculated for  $\text{C}_{18}\text{H}_{11}\text{Cl}_2\text{NO}_2$ : C, 81.56; H, 5.42; N, 3.96; found: C, 81.69; H, 5.42; N, 3.90 %.

**1-(4-fluorophenyl)-1H-naphtho[1,2-e][1,3]oxazin-3(2H)-one (4e).**

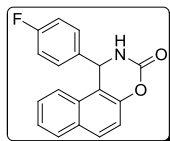

**White solid; mp: 206-208<sup>o</sup>C; <sup>1</sup>H NMR (200 MHz, DMSO-*d*<sub>6</sub>)**  $\delta$  6.21 (d, 1H, *J*= 4.4 Hz), 6.97-7.10 (m 2H), 7.14-7.24 (m, 3H), 7.33-7.42 (m, 2H), 7.63 (d, 1H, *J*= 8.5 Hz), 7.72-7.76 (m, 1H), 8.07-8.12 (m, 1H), 9.68 (br, s, 1H); **<sup>13</sup>C NMR (50 MHz, DMSO-*d*<sub>6</sub>)**:162.10, 155.05, 149.15, 137.38, 132.03, 131.46, 130.58, 127.33, 127.03, 126.60, 125.78, 125.69, 119.77, 115.82, 114.58, 53.66; ESIMS: *m/z* 294 (M+H); IR (KBr): 3334, 1714, 1444, 747 cm<sup>-1</sup>; Analysis calculated for C<sub>18</sub>H<sub>12</sub>FNO<sub>2</sub>: C, 73.71; H, 4.12; N, 4.78 ; found: C, 73.83; H, 4.02; N, 4.89 %.

**1-(3-bromophenyl)-1H-naphtho[1,2-e][1,3]oxazin-3(2H)-one(4f).**

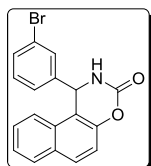

**White solid; mp: 225-227<sup>o</sup>C; <sup>1</sup>H NMR (200 MHz, DMSO-*d*<sub>6</sub>)**  $\delta$  6.09 (d, 1H, *J*= 4.1 Hz), 7.00-7.11 (m, 2H), 7.22-7.27 (m, 4H), 7.44-7.48 (m, 2H), 7.57-7.61 (m, 1H), 8.00-8.05 (m, 1H), 9.69 (br, s, 1H); **<sup>13</sup>C NMR (50 MHz, DMSO-*d*<sub>6</sub>)**:155.07, 149.15, 148.03, 132.10, 132.03, 131.46, 131.04, 129.47, 127.33, 127.03, 126.60, 126.31, 125.78, 125.69, 122.35, 119.77, 115.82, 53.40; ESIMS: *m/z* 354 (M+H); IR (KBr): 3329, 1703, 1457, 756 cm<sup>-1</sup>; Analysis calculated for C<sub>18</sub>H<sub>12</sub>BrNO<sub>2</sub>: C, 61.04; H, 3.41; N, 3.95 ; found: C, 61.13; H, 3.49; N, 3.84 %.

**4-phenyl-3,4-dihydro-2H-naphtho[2,1-e][1,3]oxazin-2-one(4g).**

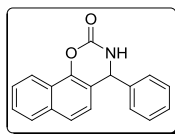

**White solid; mp: 200-202<sup>o</sup>C; <sup>1</sup>H NMR (200 MHz, DMSO-*d*<sub>6</sub>)**  $\delta$  5.90 (d, 1H, *J*= 4.4 Hz), 7.16-7.21 (m, 1H), 7.27-7.34 (m, 5H), 7.50-7.66 (m, 3H), 7.74-7.79 (m, 1H), 7.98 (d, 1H, *J*= 7.4 Hz), 8.23 (br, s, 1H); **<sup>13</sup>C NMR (50 MHz, DMSO-*d*<sub>6</sub>)**:156.10, 148.20, 142.11, 134.10, 128.73, 128.36, 128.22, 127.29, 127.11, 125.17, 124.89, 124.02, 121.68, 121.11, 117.23, 53.40; ESIMS: *m/z* 276 (M+H); IR (KBr): 3339, 1717, 1447, 758 cm<sup>-1</sup>; Analysis calculated for C<sub>18</sub>H<sub>13</sub>NO<sub>2</sub>:C, 78.53; H, 4.76; N, 5.09; found: C, 78.63; H, 4.69; N, 4.95 %.

**4-p-tolyl-3,4-dihydro-2H-naphtho[2,1-e][1,3]oxazin-2-one (4h).**

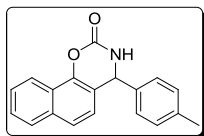

**White solid; mp: 212-215<sup>0</sup>C;** <sup>1</sup>H NMR (200 MHz, DMSO-d<sub>6</sub>) δ 2.25 (s, 3H), 5.92 (d, 1H, *J*= 4.7 Hz), 7.11-7.29 (m, 5H), 7.49-7.67 (m, 3H), 7.47-7.78 (m, 1H), 7.98 (d, 1H, *J*= 7.9 Hz), 8.41 (br, s, 1H); <sup>13</sup>C NMR (50 MHz, DMSO-d<sub>6</sub>):156.13, 148.20, 139.57, 137.94, 134.10, 129.77, 128.27, 128.22, 127.11, 125.17, 124.89, 124.02, 121.68, 121.11, 117.23, 53.40, 21.13; ESIMS: *m/z* 290 (M+H); IR (KBr): 3318, 1719, 1442, 751 cm<sup>-1</sup>; Analysis calculated for C<sub>19</sub>H<sub>15</sub>NO<sub>2</sub>: C, 78.87; H, 5.23; N, 4.84; found: C, 78.79; H, 5.31; N, 4.91 %.

**4-(3,4,5-trimethoxyphenyl)-3,4-dihydro-2H-naphtho[2,1-e][1,3]oxazin-2-one (4i).**

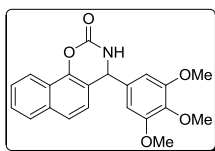

**White solid; mp: 230-233<sup>0</sup>C;** <sup>1</sup>H NMR (200 MHz, DMSO-d<sub>6</sub>) δ 3.77 (s, 3H), 3.83 (s, 3H), 6.01 (d, 1H, *J*= 4.8 Hz), 6.44 (s, 2H), 7.38 (d, 1H, *J*= 8.4 Hz), 7.50-7.64 (m, 3H), 7.74-7.78 (m, 1H), 7.90-7.98 (m, 2H); <sup>13</sup>C NMR (50 MHz, DMSO-d<sub>6</sub>):156.10, 154.29, 148.20, 139.99, 136.39, 134.10, 128.22, 127.11, 125.17, 124.89, 124.02, 121.68, 121.11, 117.23, 106.81, 60.65, 56.79, 52.67; ESIMS: *m/z* 366 (M+H); IR (KBr): 3335, 1714, 1445, 756 cm<sup>-1</sup>; Analysis calculated for C<sub>21</sub>H<sub>19</sub>NO<sub>5</sub>: C, 69.03; H, 5.24; N, 3.83 %; found: C, 69.11; H, 5.29; N, 3.71 %.

**1-phenyl-1H-naphtho[1,2-e][1,3]oxazine-3(2H)-thione(4j).**

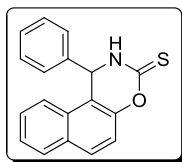

**White semi solid;** <sup>1</sup>H NMR (200 MHz, DMSO-d<sub>6</sub>) δ 6.94 (s, 1H), 6.29-6.27 (m, 5H), 7.45 (d, 1H, *J*=8.7 Hz), 7.60-7.66 (m, 3H), 7.76-7.80 (m, 1H), 7.87-7.92 (m, 1H), 8.97 (br, s, 1H); <sup>13</sup>C NMR (50 MHz, DMSO-d<sub>6</sub>): 187.43, 149.09, 142.86, 132.03, 131.46, 128.73, 128.13, 127.33, 127.18, 127.03, 126.60, 126.10, 125.69, 121.76, 116.06, 56.69; ESIMS: *m/z* 292 (M+H); IR (KBr): 3062, 2923, 1630, 1602, 1506, 1460, 750 cm<sup>-1</sup>; Analysis calculated for C<sub>18</sub>H<sub>13</sub>NOS: C, 74.20; H, 4.50; N, 4.81 %; found: C, 74.38; H, 4.69; N, 4.77 %;

**1-(3-bromophenyl)-1H-naphtho[1,2-e][1,3]oxazine-3(2H)-thione (4k).**

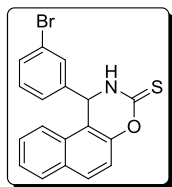

**White semi solid;**  $^1\text{H NMR}$  (200 MHz,  $\text{DMSO-d}_6$ )  $\delta$  6.39 (s, 1H), 6.77-6.79 (m, 2H), 6.89 (d, 1H,  $J=8.6$  Hz), 7.03-7.08 (m, 4H), 7.16-7.23 (m, 2H), 7.30-7.35 (m, 1H), 8.40 (br, s, 1H);  $^{13}\text{C NMR}$  (50 MHz,  $\text{DMSO-d}_6$ ): 187.48, 149.12, 148.03, 132.10, 132.08, 131.46, 131.04, 129.47, 127.33, 127.03, 126.59, 126.31, 126.10, 125.69, 122.35, 121.79, 116.10, 56.48; ESIMS:  $m/z$  369 (M+H); IR (KBr): 3059, 2927, 1628, 1608, 1511, 1463, 754  $\text{cm}^{-1}$ ; Analysis calculated for  $\text{C}_{18}\text{H}_{12}\text{BrNOS}$ : C, 58.39; H, 3.27; N, 3.78 %; found: C, 58.47; H, 3.35; N, 3.82 %.

**1-(4-methoxyphenyl)-1H-naphtho[1,2-e][1,3]oxazine-3(2H)-thione (4l).**

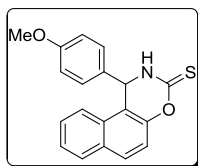

**White semi solid;**  $^1\text{H NMR}$  (200 MHz,  $\text{DMSO-d}_6$ )  $\delta$  3.78 (s, 3H), 5.84 (s, 1H), 6.87 (d, 2H,  $J = 7.5$  Hz), 7.20-7.39 (m, 4H), 7.50 (s, 2H), 7.64-8.01 (m, 2H), 8.63 (br, s, 1H);  $^{13}\text{C NMR}$  (50 MHz,  $\text{CDCl}_3+\text{DMSO-d}_6$ ): 187.40, 158.50, 149.04, 132.62, 132.03, 131.46, 129.08, 127.37, 127.03, 126.60, 126.10, 125.69, 121.76, 116.06, 113.63, 56.69, 56.04; ESIMS:  $m/z$  322 (M+H); IR (KBr): 3069, 2930, 1634, 1610, 1501, 1468, 752  $\text{cm}^{-1}$ ; Analysis calculated for  $\text{C}_{19}\text{H}_{15}\text{NO}_2\text{S}$ : C, 71.00; H, 4.70 %; N, 4.36; found: C, 71.14; H, 4.63; N, 4.27 %.

**N-((2-hydroxynaphthalen-1-yl)(phenyl)methyl)benzamide(4m).**

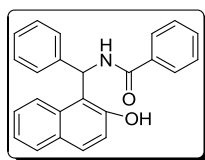

**White solid; mp: 233-236 $^{\circ}$ C;**  $^1\text{H NMR}$  (200 MHz,  $\text{DMSO-d}_6$ )  $\delta$  6.89 (s, 1H), 7.08 (d, 1H,  $J=7.3$  Hz), 7.25-7.32 (m, 4H), 7.35-7.45 (m, 6H), 7.64 (d, 1H,  $J=7.3$  Hz), 7.79 (d, 1H,  $J=6.9$  Hz), 7.84-7.89 (m, 2H), 8.09-8.14 (m, 1H) 9.56 (br, s, 1H);  $^{13}\text{C NMR}$  (50 MHz,  $\text{CDCl}_3+\text{DMSO-d}_6$ ): 167.30, 155.13, 142.59, 135.39, 132.59, 131.44, 130.27, 128.53, 128.42, 128.08, 127.98, 127.36, 126.99, 126.88, 126.56, 122.55, 117.26, 62.66; ESIMS:  $m/z$  354 (M+H); IR (KBr): 3375, 1632, 1530, 1477, 749  $\text{cm}^{-1}$ ; Analysis calculated for  $\text{C}_{24}\text{H}_{19}\text{NO}_2$ : C, 81.56; H, 5.42; N, 3.96; found: C, 81.67; H, 5.51; N, 3.83 %.

**N-((2-hydroxynaphthalen-1-yl)(2-methoxyphenyl)methyl)benzamide (4n).**

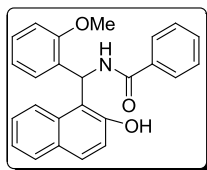

**White solid; mp: 270<sup>0</sup>C;** <sup>1</sup>H NMR (200 MHz, DMSO-d<sub>6</sub>) δ 4.34 (s, 3H), 6.85 (s, 1H), 7.52-7.83 (m, 3H), 7.90-8.20 (m, 8H), 8.28-8.71 (m, 4H), 10.15 (br, s, 1H); <sup>13</sup>C NMR (50 MHz, CDCl<sub>3</sub>+DMSO-d<sub>6</sub>): 167.32, 159.83, 154.83, 135.39, 132.59, 131.44, 130.27, 130.22, 129.59, 128.67, 128.42, 128.24, 128.08, 127.26, 126.99, 126.88, 126.56, 122.52, 120.83, 115.79, 111.95, 57.06, 56.79; ESIMS: m/z 384 (M+H); IR (KBr): 3382, 1638, 1534, 1479, 751; Analysis calculated for C<sub>25</sub>H<sub>21</sub>NO<sub>3</sub>: C, 78.31; H, 5.52; N, 3.65; found: C, 78.41; H, 5.48; N, 3.57%.

**N-((2-hydroxynaphthalen-1-yl)(3-nitrophenyl)methyl)benzamide(4o).**

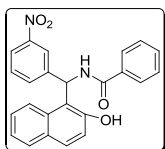

**Yellow solid mp: 242-245;** <sup>1</sup>H NMR (200 MHz, DMSO-d<sub>6</sub>) δ 6.82 (s, 1H), 7.06 (d, 1H, J=7.3 Hz), 7.19-7.39 (m, 5H), 7.46-7.59 (m, 2H), 7.70-7.82 (m, 4H), 8.03-8.14 (m, 2H), 8.29 (s, 1H), 9.73 (br, s, 1H); <sup>13</sup>C NMR (50 MHz, CDCl<sub>3</sub>+DMSO-d<sub>6</sub>): 167.35, 155.13, 150.12, 143.61, 135.39, 135.07, 132.59, 131.44, 130.27, 129.34, 128.42, 128.08, 127.26, 126.99, 126.88, 126.56, 124.48, 124.41, 122.55, 117.26, 63.38; ESIMS: m/z 399 (M+H); IR (KBr): 3381, 1635, 1528, 1469, 756 cm<sup>-1</sup>; Analysis calculated for C<sub>24</sub>H<sub>18</sub>N<sub>2</sub>O<sub>4</sub>: C, 72.35; H, 4.55; N, 7.03; found: C, 72.28; H, 4.63; N, 7.13 %.

**N-((3-bromophenyl)(2-hydroxynaphthalen-1-yl)methyl)benzamide(4p).**

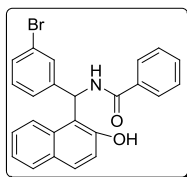

**Yellow solid; mp: 190-192<sup>0</sup>C;** <sup>1</sup>H NMR (200 MHz, DMSO-d<sub>6</sub>) δ 6.84 (s, 1H), 7.11 (d, 1H, J=7.6 Hz), 7.18-7.32 (m, 2H), 7.34-7.45 (m, 5H), 7.58-7.64 (m, 2H), 7.75-7.89 (m, 3H), 8.15-8.20 (m, 1H), 9.86 (br, s, 1H); <sup>13</sup>C NMR (50 MHz, CDCl<sub>3</sub>+DMSO-d<sub>6</sub>): 167.30, 155.13, 147.88, 135.39, 132.59, 132.42, 131.44, 131.13, 130.27, 129.53, 128.42, 128.08, 127.26, 126.99, 126.88, 126.56, 126.23, 122.55, 121.61, 117.26, 63.38; ESIMS: m/z 432 (M+H); IR (KBr): 3389, 1638, 1533, 1479, 747 cm<sup>-1</sup>; Analysis calculated for C<sub>24</sub>H<sub>18</sub>BrNO<sub>2</sub>: C, 66.68; H, 4.20; N, 3.24; found: C, 66.75; H, 4.23; N, 3.31%.

**N-((4-fluorophenyl)(2-hydroxynaphthalen-1-yl)methyl)benzamide(4q).**

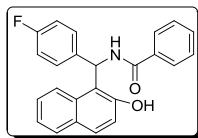

**White solid; mp: 183-187<sup>o</sup>C; <sup>1</sup>H NMR (300 MHz, DMSO-*d*<sub>6</sub>)** δ 6.89 (s, 1H), 6.98 (m, 3H), 7.22-7.31 (m, 3H), 7.34-7.47 (m, 4H), 7.64 (d, 1H, *J*=7.6 Hz), 7.79 (d, 1H, *J*=7.4 Hz), 7.84-7.89 (m, 2H), 8.09-8.14 (m, 1H), 9.77 (br, s, 1H) **<sup>13</sup>C NMR (50 MHz, CDCl<sub>3</sub>+DMSO-*d*<sub>6</sub>):** 167.38, 162.52, 155.13, 137.17, 135.39, 132.59, 131.44, 130.27, 130.26, 128.42, 128.08, 127.26, 126.99, 126.88, 126.56, 122.55, 117.26, 114.42, 62.66; ESIMS: *m/z* 272 (M+H). IR (KBr): 3382, 1641, 1531, 1473, 749 cm<sup>-1</sup>; Analysis calculated for C<sub>24</sub>H<sub>18</sub>FNO<sub>2</sub>: C, 77.61; H, 4.88; N, 3.77%; found: C, 77.73; H, 4.78; N, 3.82 %.

**N-((2-hydroxynaphthalen-1-yl)(3,4,5-trimethoxyphenyl)methyl)benzamide(4r).**

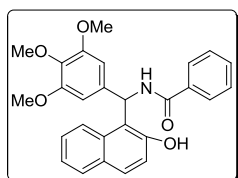

**White solid; mp: 242-245<sup>o</sup>C; <sup>1</sup>H NMR (200 MHz, DMSO-*d*<sub>6</sub>)** δ 4.52 (s, 9H), 6.91 (s, 1H), 7.40 (s, 2H), 7.90-8.18 (m, 7H), 8.36-8.67 (m, 4H), 10.29 (s, 1H), 10.29, (s, 1H), 10.45 (br, s, 1H); **<sup>13</sup>C NMR (50 MHz, DMSO-*d*<sub>6</sub>):**167.30, 155.13, 153.73, 139.60, 136.20, 135.39, 132.59, 131.44, 130.27, 128.42, 128.08, 127.26, 126.99, 126.88, 126.56, 122.55, 117.26, 106.72, 63.59, 60.65, 56.79; ESIMS: *m/z* 444 (M+H); IR (KBr): 3398, 1636, 1525, 1474, 752cm<sup>-1</sup>; Analysis calculated for C<sub>27</sub>H<sub>25</sub>NO<sub>5</sub>: C, 73.12; H, 5.68; N, 3.16 %; found: C, 73.20; H, 5.74; N, 3.09 %.

**N-((2-hydroxynaphthalen-1-yl)(phenyl)methyl)acetamide(4s).**

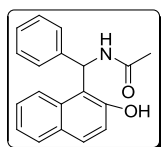

**White solid; mp: 243-246<sup>o</sup>C; <sup>1</sup>H NMR (200 MHz, DMSO-*d*<sub>6</sub>)** δ 1.89 (s, 3H), 6.77 (s, 1H), 7.02 (d, 1H, *J*=7.1 Hz), 7.20-7.38 (m, 7H), 7.64 (d, 1H, *J*=7.1 Hz), 7.79 (d, 1H, *J*=7.4 Hz), 8.06 (d, 1H, *J*=7.7 Hz), 8.61 (br, s, 1H); **<sup>13</sup>C NMR (50 MHz, CDCl<sub>3</sub>+DMSO-*d*<sub>6</sub>):** 169.25, 155.13, 142.59, 132.59, 130.27, 128.53, 128.08, 127.98, 127.36, 127.26, 126.99, 126.88, 126.56, 122.55, 117.26, 60.00, 22.75; ESIMS: *m/z* 292 (M+H); IR (KBr): 3384, 1640, 1537, 1469, 753 cm<sup>-1</sup>; Analysis calculated for C<sub>19</sub>H<sub>17</sub>NO<sub>2</sub>: C, 78.33; H, 5.88; N, 4.81 %; found: C, 78.49; H, 5.76; N, 4.92 %.

**N-((2-hydroxynaphthalen-1-yl)(4-nitrophenyl)methyl)acetamide(4t).**

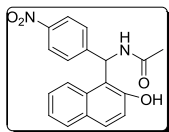

**Yellow solid; mp: 238-241; <sup>1</sup>H NMR (200 MHz, DMSO-d<sub>6</sub>)** δ 1.87 (s, 3H), 6.81 (s, 1H), 7.02 (d, 1H, *J*=7.2 Hz), 7.24-7.42 (m, 2H), 7.57-7.64 (m, 3H), 7.79 (d, 1H, *J*=6.8 Hz), 8.06 (d, 1H, *J*=6.8 Hz), 8.16 (d, 1H, *J*=8.5 Hz), 8.68 (br, s, 1H); **<sup>13</sup>C NMR (50 MHz, CDCl<sub>3</sub>+DMSO-d<sub>6</sub>):**169.25, 155.13, 149.77, 148.09, 132.59, 130.27, 128.41, 128.08, 127.26, 126.99, 126.88, 126.56, 123.96, 122.55, 117.26, 60.00, 22.75; ESIMS: *m/z* 337 (M+H); IR (KBr): 3388, 1635, 1533, 1476, 757cm<sup>-1</sup>; Analysis calculated for C<sub>19</sub>H<sub>16</sub>N<sub>2</sub>O<sub>4</sub>: C, 67.85; H, 4.79; N, 8.33; found: C, 67.93; H, 4.88; N, 8.39 %.

**N-((2,4-dichlorophenyl)(2-hydroxynaphthalen-1-yl)methyl)acetamide (4u).**

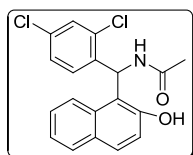

**White solid 208-210; <sup>1</sup>H NMR (200 MHz, DMSO-d<sub>6</sub>)** δ 1.85 (s, 3H), 6.87 (s, 1H), 7.06 (d, 1H, *J*=7.1 Hz), 7.22-7.32 (m, 3H), 7.38-7.46 (m, 1H), 7.61 (s, 1H), 7.72 (d, 1H, *J*=7.6 Hz), 7.83 (d, 1H, *J*=7.3 Hz), 8.17 (d, 1H, *J*=7.8 Hz), 8.74 (br, s, 1H); **<sup>13</sup>C NMR (50 MHz, DMSO-d<sub>6</sub>):**169.28, 154.83, 138.08, 135.46, 134.52, 132.59, 131.30, 130.51, 130.27, 128.67, 127.95, 127.26, 126.99, 126.88, 126.56, 122.52, 115.79, 56.89, 22.75; ESIMS: *m/z* 360 (M+H); IR (KBr): 3402, 1638, 1528, 1474, 747 cm<sup>-1</sup>; Analysis calculated for C<sub>19</sub>H<sub>15</sub>Cl<sub>2</sub>NO<sub>2</sub>: C, 63.35; H, 4.20; N, 3.89; found: C, 63.47; H, 4.11; N, 3.78 %.

**N-((4-(dimethylamino)phenyl)(2-hydroxynaphthalen-1-yl)methyl)acetamide (4v).**

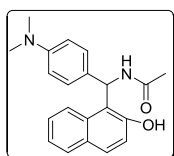

**White solid; mp: 212-215<sup>0</sup>C; <sup>1</sup>H NMR (200 MHz, DMSO-d<sub>6</sub>)** δ 2.38 (s, 3H), 3.22 (s, 6H), 6.50 (s, 1H), 6.96 (d, 2H, *J*=12.4 Hz), 7.27 (d, 2H, *J*=12.4 Hz), 7.51-7.85 (m, 4H), 7.95-8.21 (m, 3H); **<sup>13</sup>C NMR (50 MHz, DMSO-d<sub>6</sub>):** 169.25, 155.13, 150.87, 132.59, 131.21, 130.27, 128.08, 127.71, 127.26, 126.99, 126.88, 126.56, 122.55, 117.26, 112.01, 60.00, 41.91, 22.75; ESIMS: *m/z* 335(M+H). IR (KBr): 3392, 1636, 1527, 1465, 747 cm<sup>-1</sup>; Analysis calculated for C<sub>21</sub>H<sub>22</sub>N<sub>2</sub>O<sub>2</sub>: C, 75.42; H, 6.63; N, 8.38; found: C, 75.31; H, 6.69; N, 8.24;%.



**2-chloro-N-((2-hydroxynaphthalen-1-yl)(phenyl)methyl)acetamide(4w).**

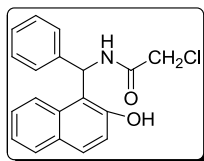

**white solid; mp: 208-210<sup>0</sup>C; <sup>1</sup>H NMR (200 MHz, DMSO-d<sub>6</sub>)** δ 4.13 (s, 2H), 6.73 (s, 1H), 7.03 (d, 1H, *J*=7.6 Hz), 7.21-7.42 (m, 7H), 7.64 (d, 1H, *J*=7.6 Hz), 7.79 (d, 1H, *J*=7.4 Hz), 8.12 (d, 1H, *J*=7.5 Hz), 8.96 (br, s, 1H); **<sup>13</sup>C NMR (50 MHz, CDCl<sub>3</sub>+DMSO-d<sub>6</sub>):** 165.82, 155.13, 142.59, 132.59, 130.27, 128.53, 128.53, 128.08, 127.98, 127.36, 126.99, 126.88, 126.56, 122.55, 117.26, 60.31, 42.39.; ESIMS: *m/z* 326 (M+H). IR (KBr): 3386, 1637, 1534, 1479, 757cm<sup>-1</sup>; Analysis calculated for C<sub>19</sub>H<sub>16</sub>ClNO<sub>2</sub>: C, 70.05; H, 4.95; N, 4.30; found: C, 70.18; H, 4.86; N, 4.24 %.

**2-chloro-N-((2-hydroxynaphthalen-1-yl)(3-nitrophenyl)methyl)acetamide (4x).**

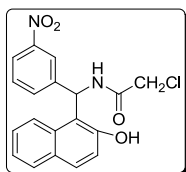

**yellow solid; mp: 220-222<sup>0</sup>C; <sup>1</sup>H NMR (200 MHz, DMSO-d<sub>6</sub>)** δ 4.13 (s, 2H), 6.73 (s, 1H), 7.09 (d, 1H, *J*=7.4 Hz), 7.24-7.42 (m, 2H), 7.49-7.64 (m, 2H), 7.75-7.83 (m, 2H), 8.09-8.20 (m, 2H), 8.35 (s, 1H), 9.17 (br, s, 1H); **<sup>13</sup>C NMR (50 MHz, CDCl<sub>3</sub>+DMSO-d<sub>6</sub>):** 165.82, 155.13, 150.12, 143.61, 135.07, 132.59, 130.27, 129.34, 128.08, 127.26, 126.99, 126.88, 126.56, 124.48, 124.41, 122.55, 117.26, 60.97, 42.39; ESIMS: *m/z* 371 (M+H). IR (KBr): 3379, 1639, 1538, 1465, 751cm<sup>-1</sup>; Analysis calculated for C<sub>19</sub>H<sub>15</sub>ClN<sub>2</sub>O<sub>4</sub>: C, 61.55; H, 4.08; N, 7.56; found: C, 61.62; H, 4.11; N, 7.63 %.

**2-chloro-N-((2-hydroxynaphthalen-1-yl)(4-methoxyphenyl)methyl)acetamide (4y).**

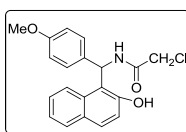

**white solid; mp: 178-181<sup>0</sup>C; <sup>1</sup>H NMR (200 MHz, DMSO-d<sub>6</sub>)** δ 3.40 (s, 3H), 3.83 (s, 2H), 6.41 (s, 1H), 6.53 (d, 2H, *J*=8.1 Hz), 6.73 (d, 1H, *J*=7.0 Hz), 6.93-7.12 (m, 4H), 7.34 (d, 1H, *J*=7.7 Hz), 7.48 (d, 1H, *J*=7.8 Hz), 7.82 (d, 1H, *J*=7.5 Hz), 8.55 (br, s, 1H); **<sup>13</sup>C NMR (50 MHz, DMSO-d<sub>6</sub>):** 165.82, 159.11, 155.13, 132.61, 132.59, 130.27, 128.63, 128.08, 127.26, 126.99, 126.88, 126.56, 122.55, 117.26, 113.42, 60.31, 56.04, 42.39; ESIMS: *m/z* 356 (M+H). IR (KBr): 3384, 1636, 1541, 1485, 753cm<sup>-1</sup>; Analysis calculated for C<sub>20</sub>H<sub>18</sub>ClNO<sub>3</sub>: C, 67.51; H, 5.10; N, 3.94; found: C, 67.47; H, 5.18; N, 3.91 %.

**N-((2-hydroxynaphthalen-1-yl)(pyridin-4-yl)methyl)acetamide (4z).**

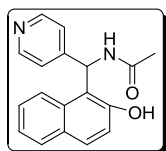

**Brown solid; mp: 218-223<sup>o</sup>C;** <sup>1</sup>H NMR (200 MHz, DMSO-*d*<sub>6</sub>) δ 1.80 (s, 3H), 6.66 (s, 1H), 6.94 (d, 1H, *J*=6.8 Hz), 7.15-7.37 (m, 4H), 7.56(d, 1H, *J*=7.4 Hz), 7.70 (d, 1H, *J*=7.8 Hz), 7.97 (d, 1H, *J*=7.1 Hz), 8.35 (d, 2H, *J*=5.8 Hz), 8.54 (br, s, 1H); <sup>13</sup>C NMR (50 MHz, DMSO-*d*<sub>6</sub>): 168.25, 155.13, 151.68, 150.81, 132.59, 130.27, 128.08, 127.26, 126.99, 126.88, 126.56, 124.58, 122.55, 117.26, 60.00, 22.75; ESIMS: *m/z* 293 (M+H). IR (KBr): 3391, 1638, 1534, 1468, 753cm<sup>-1</sup>; Analysis calculated for C<sub>18</sub>H<sub>16</sub>N<sub>2</sub>O<sub>2</sub>: C, 73.95; H, 5.52; N, 9.58; found: C, C, 73.85; H, 5.61; N, 9.52 %.

**2-chloro-N-((2-hydroxynaphthalen-1-yl)(pyridin-2-yl)methyl)acetamide (4z').**

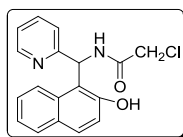

**Brown solid; mp: 204-206<sup>o</sup>C;** <sup>1</sup>H NMR (200 MHz, DMSO-*d*<sub>6</sub>) δ 4.13 (s, 2H), 6.86 (s, 1H), 7.12 (d, 1H, *J*=7.2 Hz), 7.24-7.48 (m, 4H), 7.61-7.78 (m, 3H), 8.09 (d, 1H, *J*=7.6 Hz), 8.55 (d, 1H, *J*= 4.1 Hz), 9.12 (br, s, 1H); <sup>13</sup>C NMR (50 MHz, DMSO-*d*<sub>6</sub>): 165.82, 163.71, 156.22, 145.73, 138.32, 132.59, 130.27, 127.26, 126.99, 126.88, 126.61, 126.56, 126.25, 123.18, 121.40, 116.70, 62.47, 42.39; ESIMS: *m/z* 327 (M+H). IR (KBr): 3395, 1627, 1537, 1467, 748 cm<sup>-1</sup>; Analysis calculated for C<sub>18</sub>H<sub>15</sub>ClN<sub>2</sub>O<sub>2</sub>: C, C, 66.16; H, 4.63; N, 8.57; found: C, 66.25; H, 4.54; N, 8.67 %.

**N-((2-hydroxynaphthalen-1-yl)(5-nitrothiophen-2-yl)methyl)benzamide (4z'').**

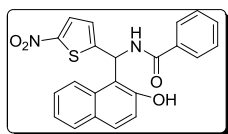

**yellow solid; mp: 189-192<sup>o</sup>C;** <sup>1</sup>H NMR (200 MHz, DMSO-*d*<sub>6</sub>) δ 6.96 (s, 1H), 7.12 (d, 1H, *J*=7.0 Hz), 7.24-7.45 (m, 4H), 7.72 (d, 1H, *J*=7.5 Hz), 7.78-7.89 (m, 3H), 8.03 (d, 1H, *J*=4.5 Hz), 8.22 (d, 1H, *J*=7.5 Hz), 9.83 (br, s, 1H); <sup>13</sup>C NMR (50 MHz, DMSO-*d*<sub>6</sub>): 167.35, 158.54, 153.97, 152.88, 135.39, 132.59, 131.44, 130.27, 129.75, 128.42, 128.08, 128.00, 127.26, 126.99, 126.88, 126.56, 123.13, 119.80, 119.52, 62.11; ESIMS: *m/z* 348 (M+H). IR (KBr): 3410, 1641, 1546, 1483, 757cm<sup>-1</sup>; Analysis calculated for C<sub>22</sub>H<sub>16</sub>N<sub>2</sub>O<sub>4</sub>S: C, 65.33; H, 3.99; N, 6.93; found: C, 65.42; H, 3.81; N, 6.88.

urea-4a

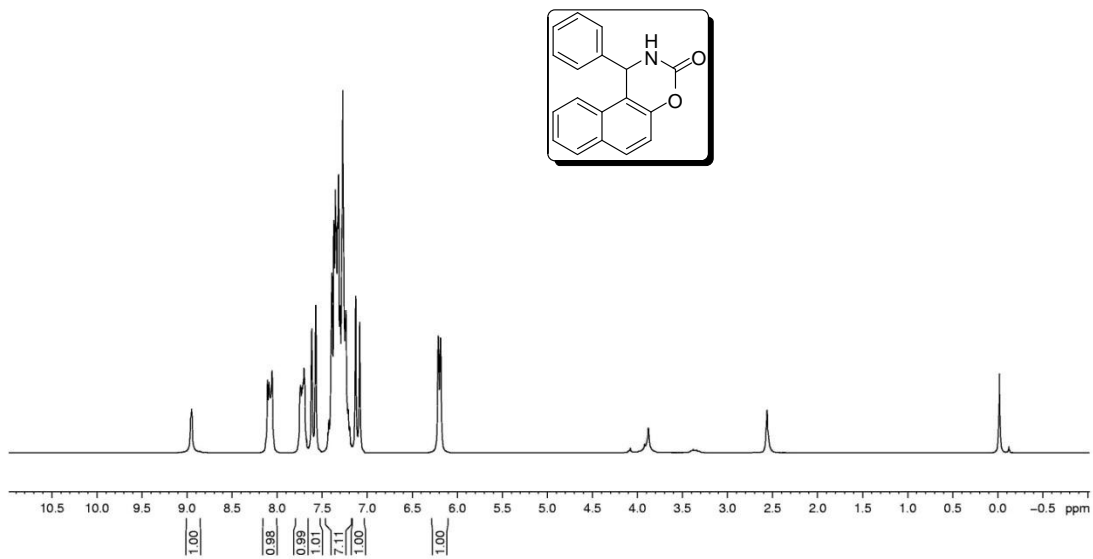

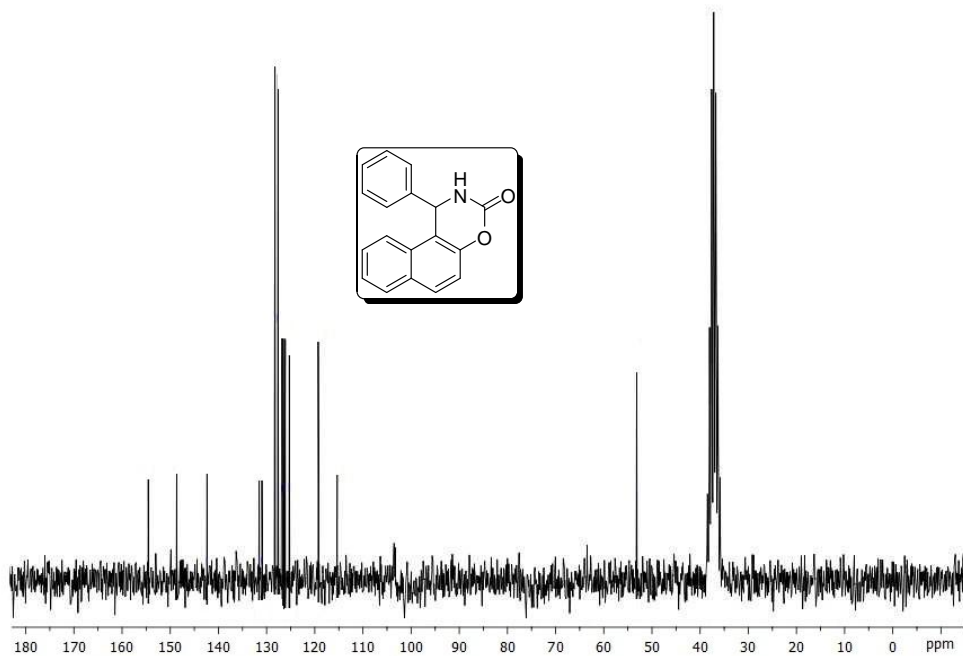

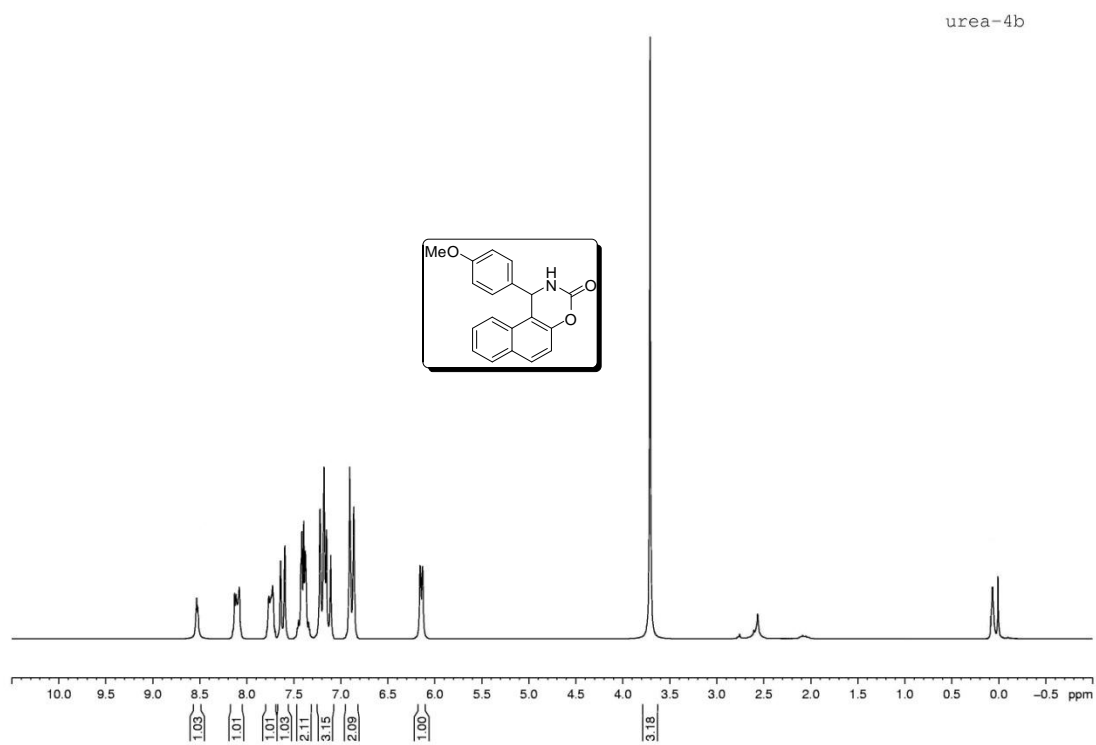

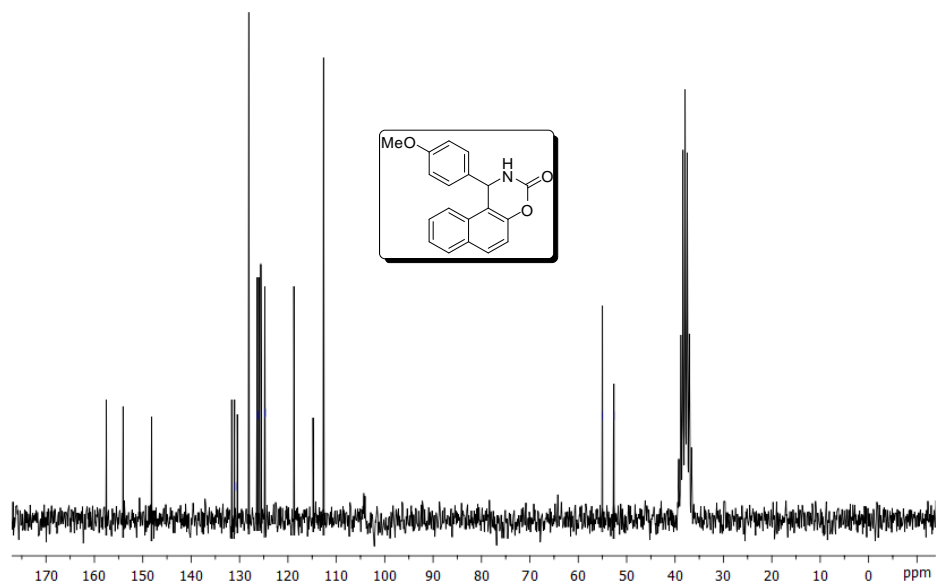

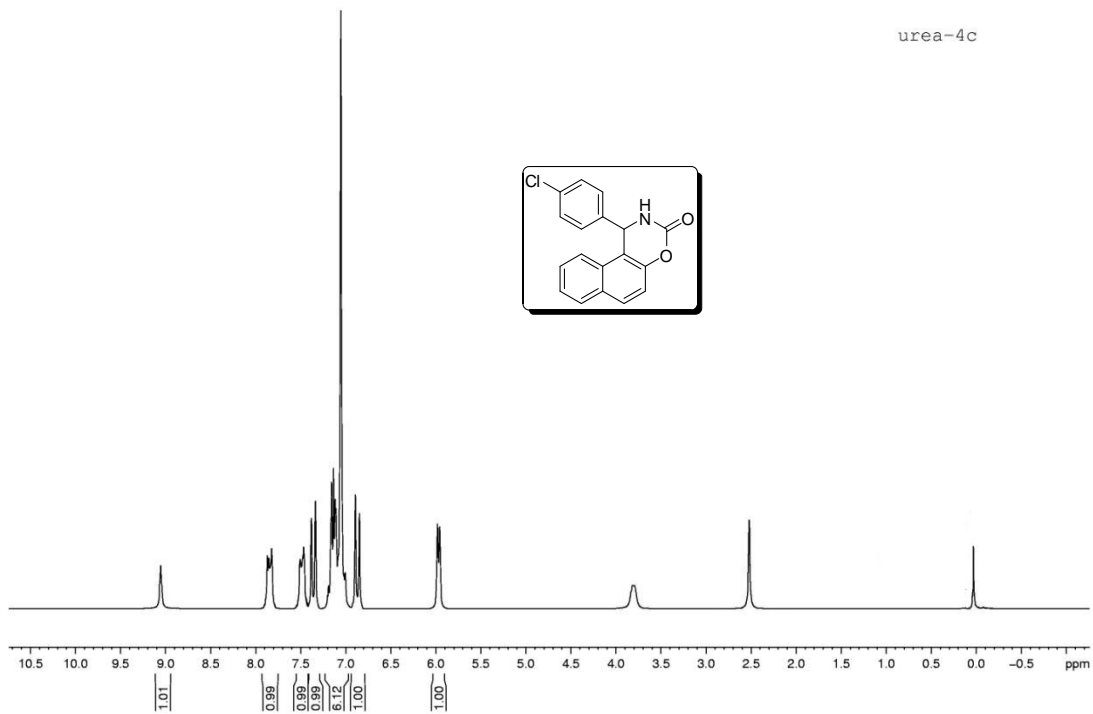

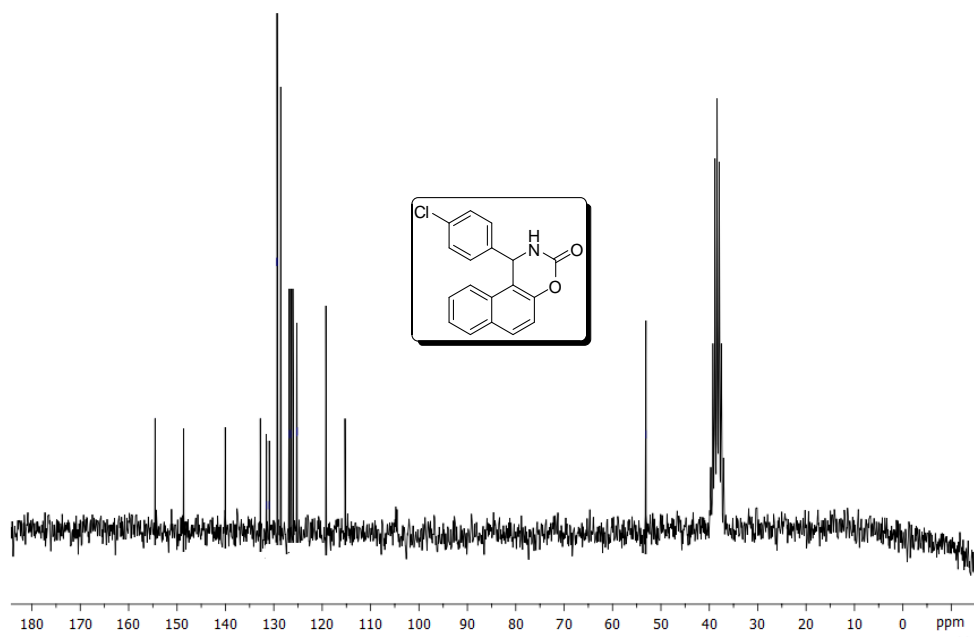



urea-4d

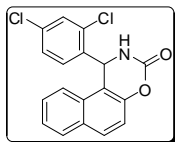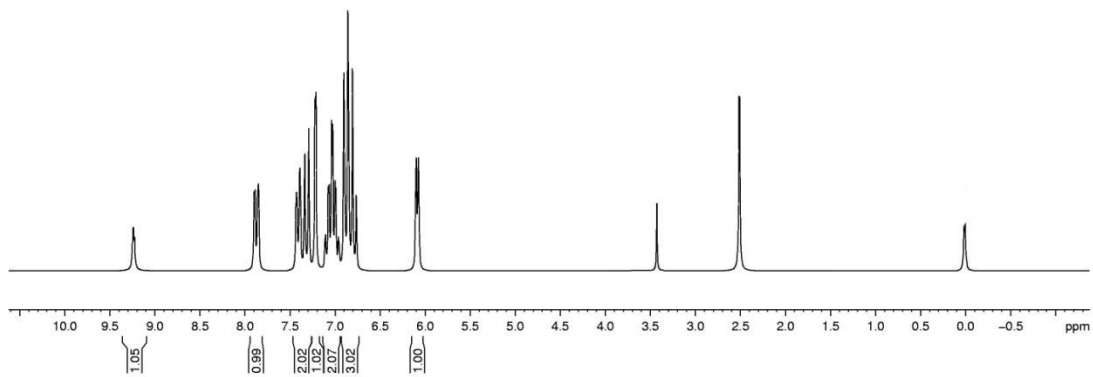

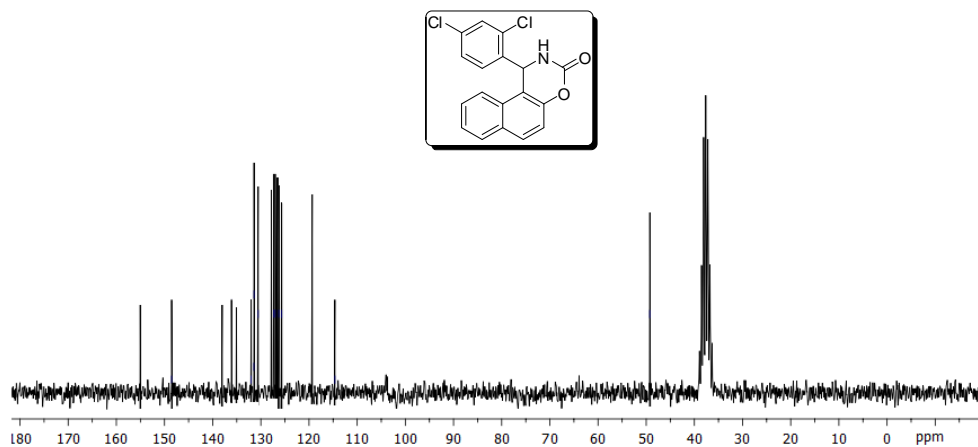

urea-4e

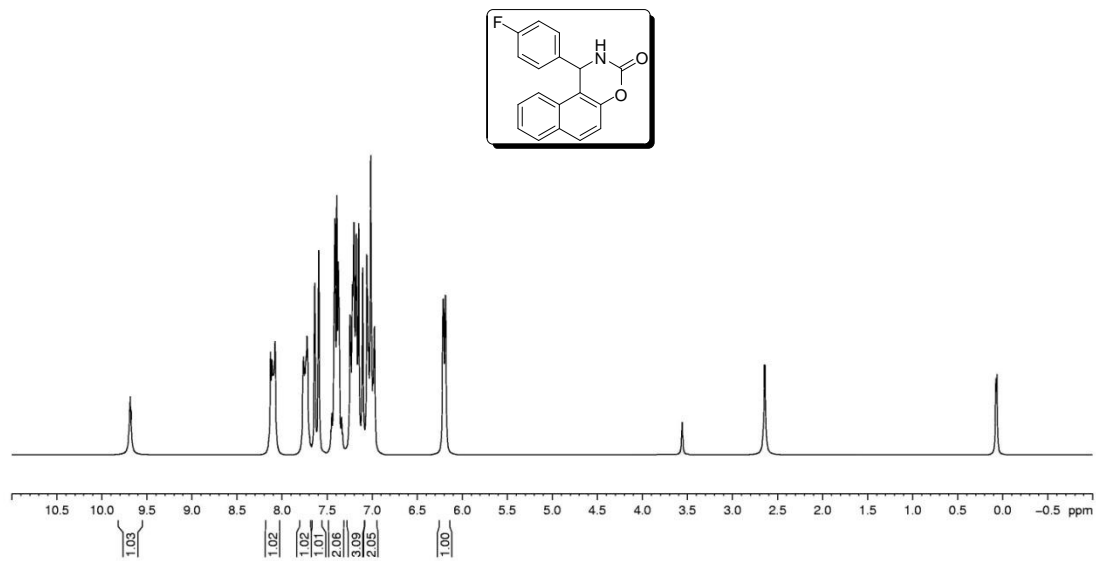

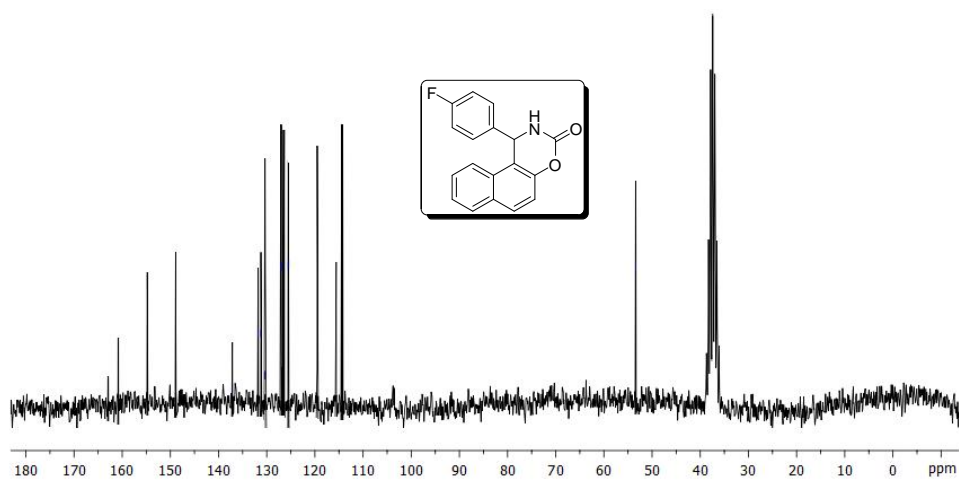

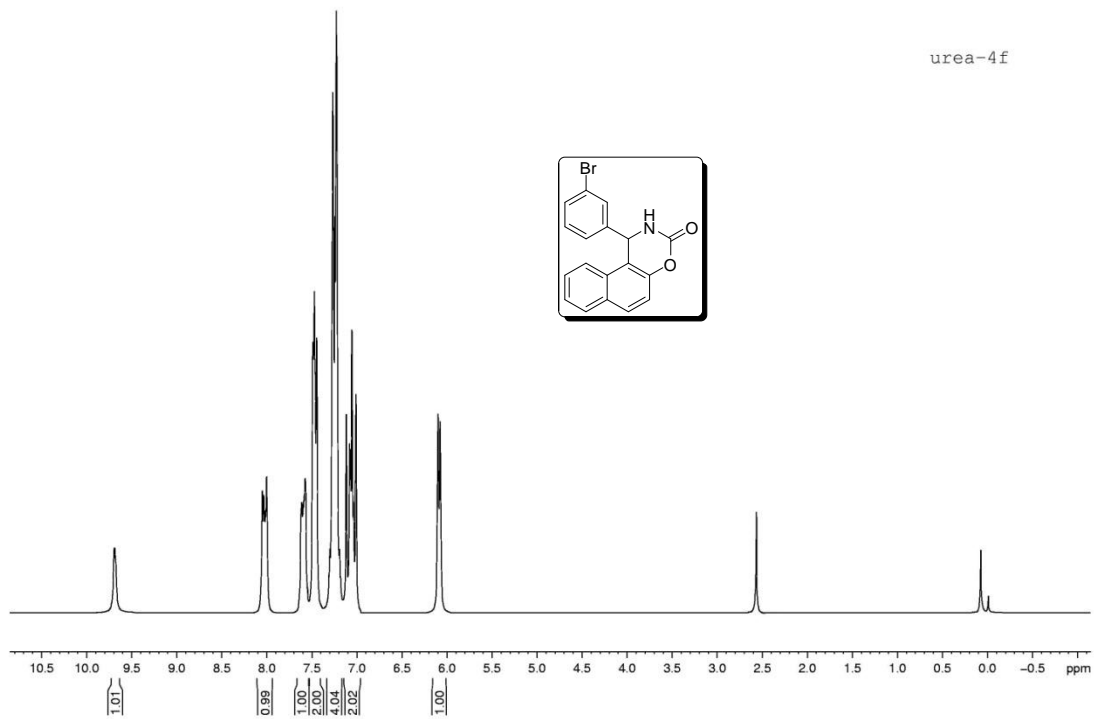

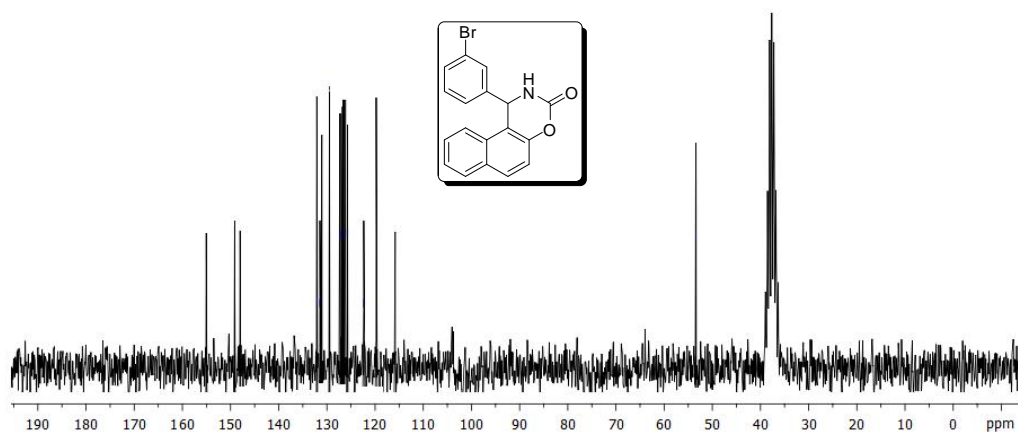

mkg-4g

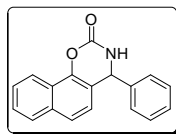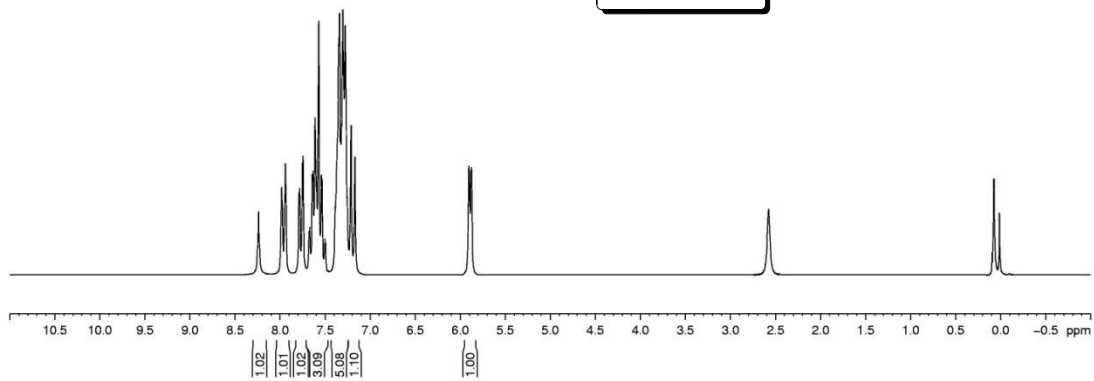

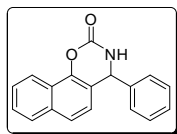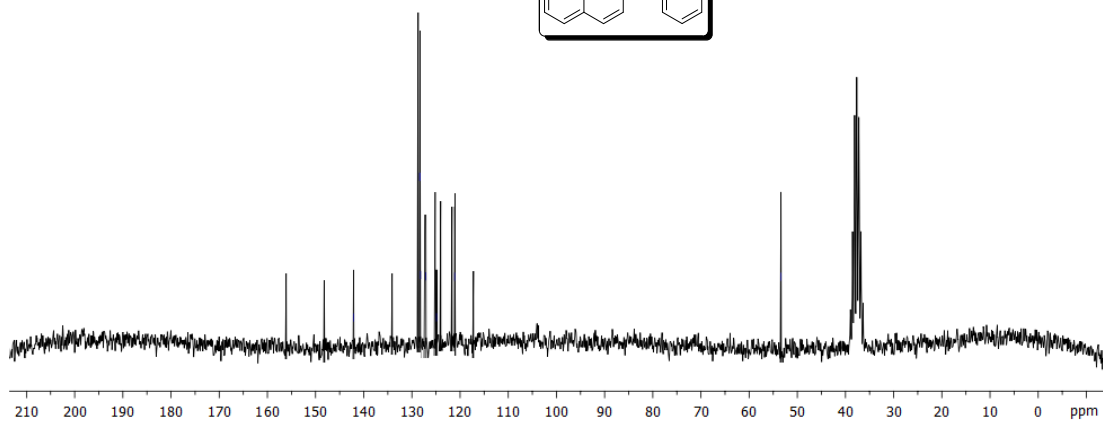



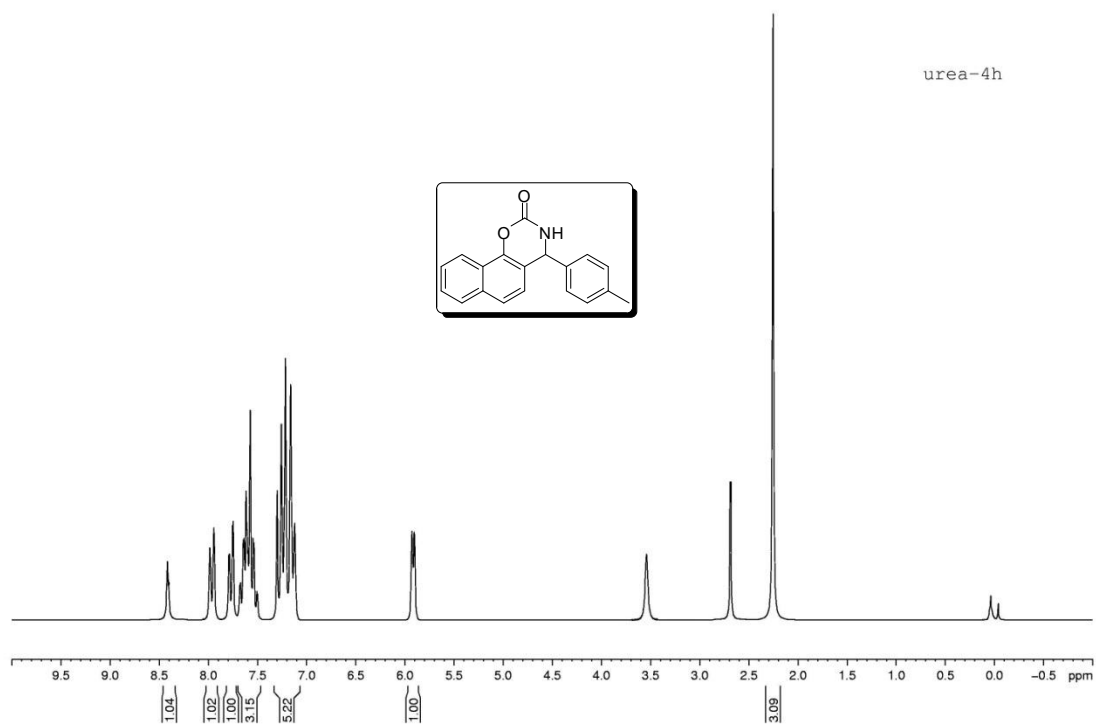

urea-4h

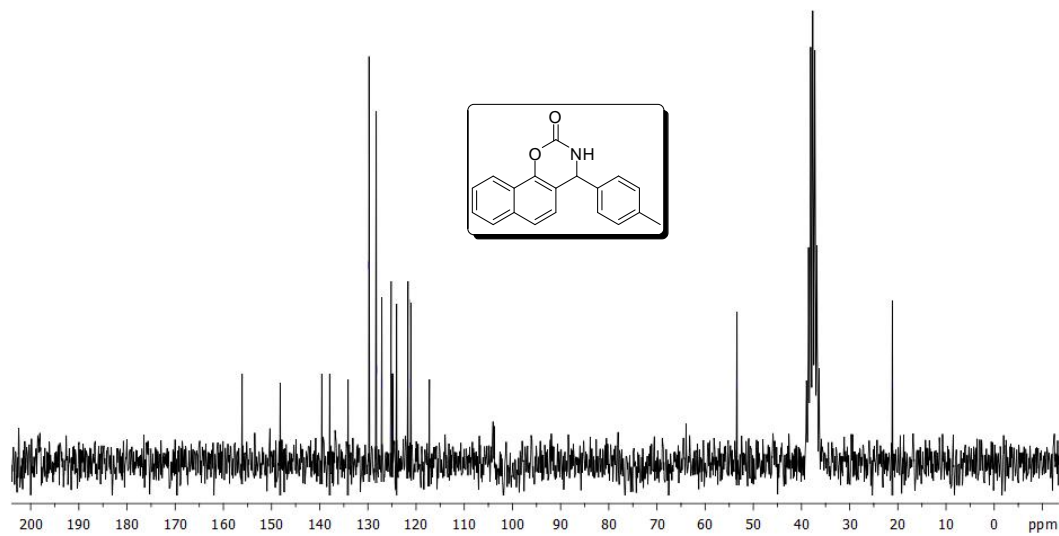

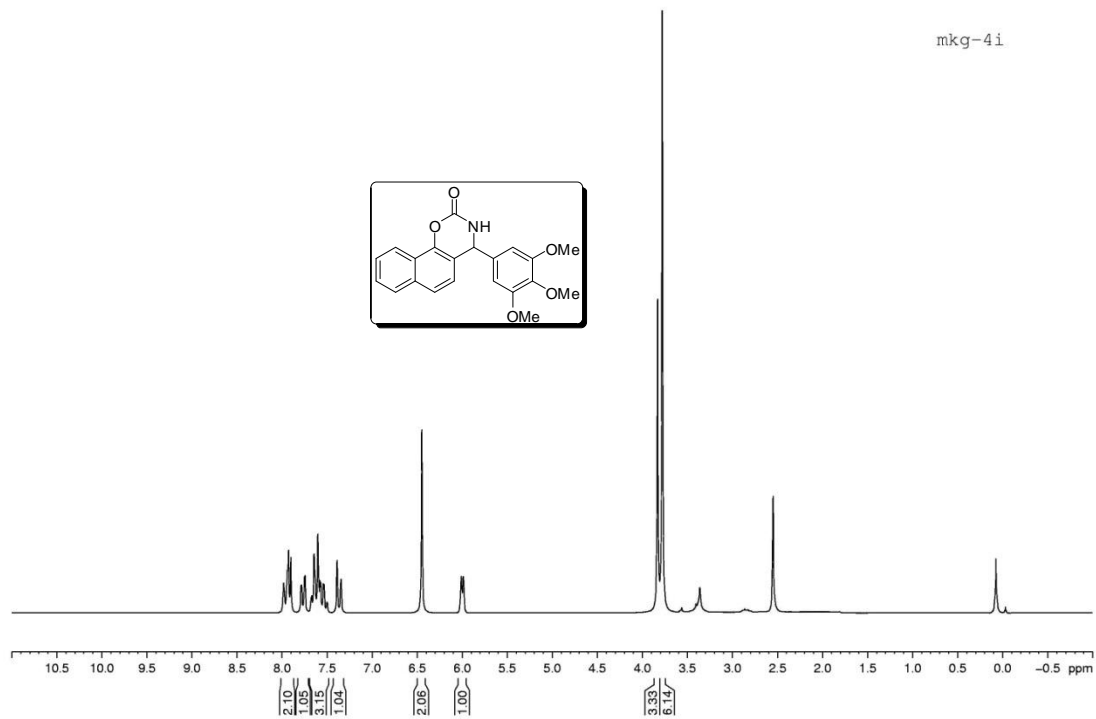

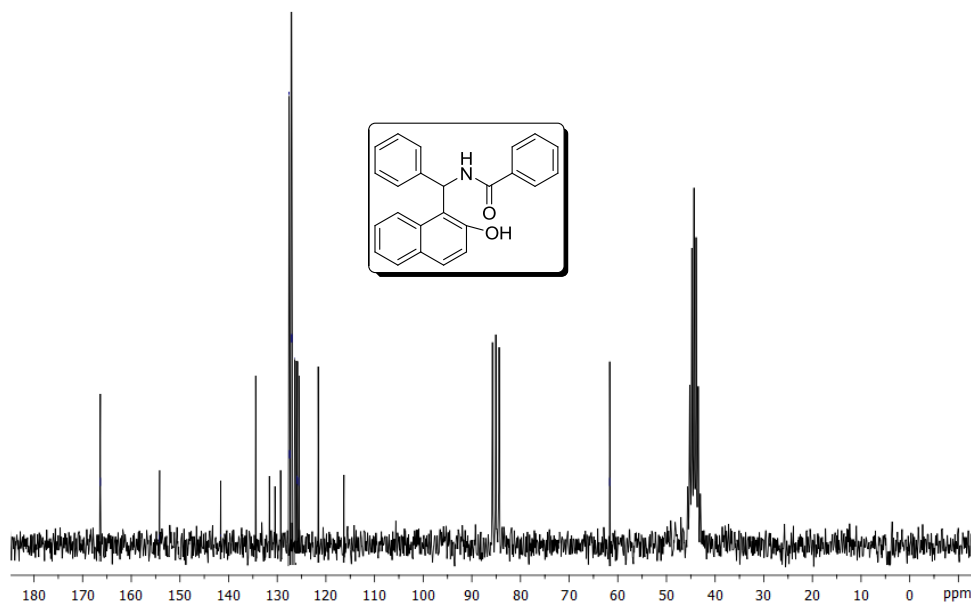

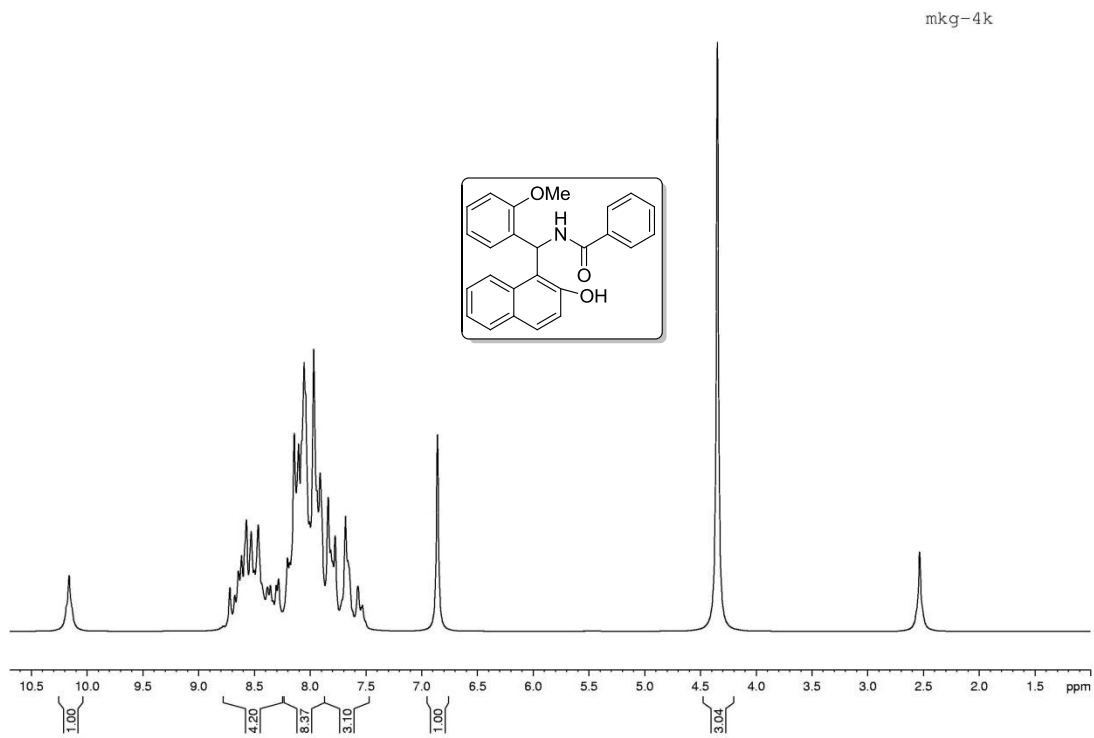

mkq-41

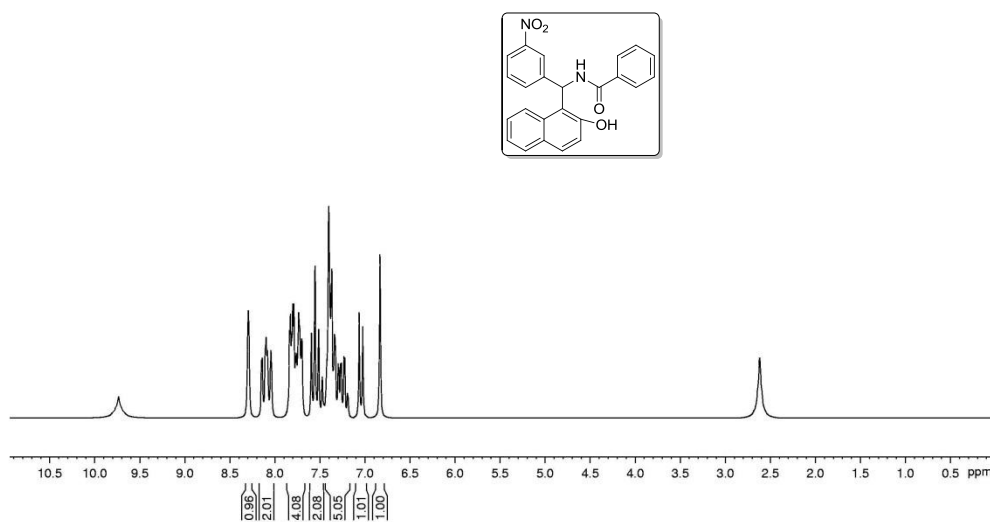

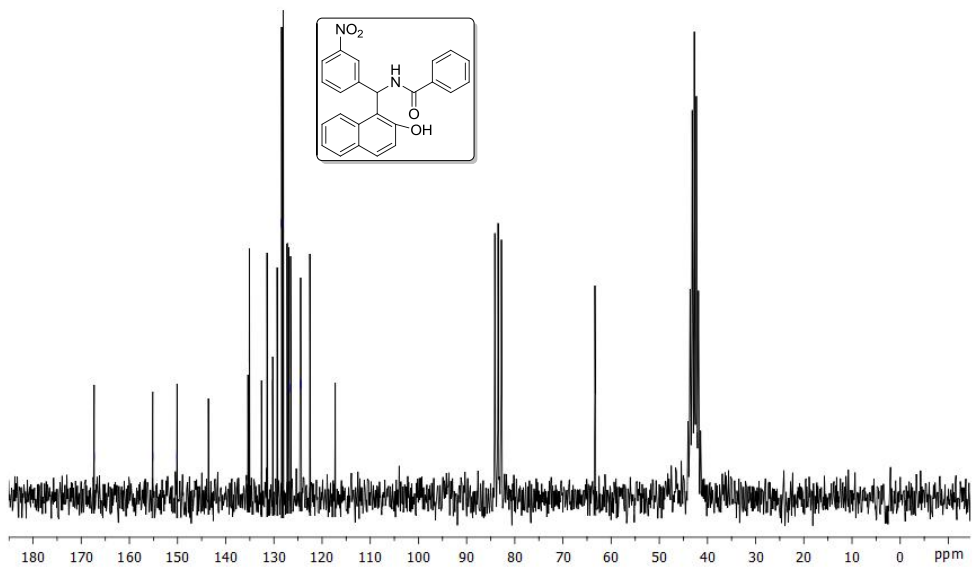

mkg-4m

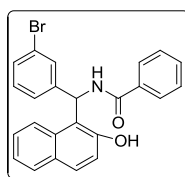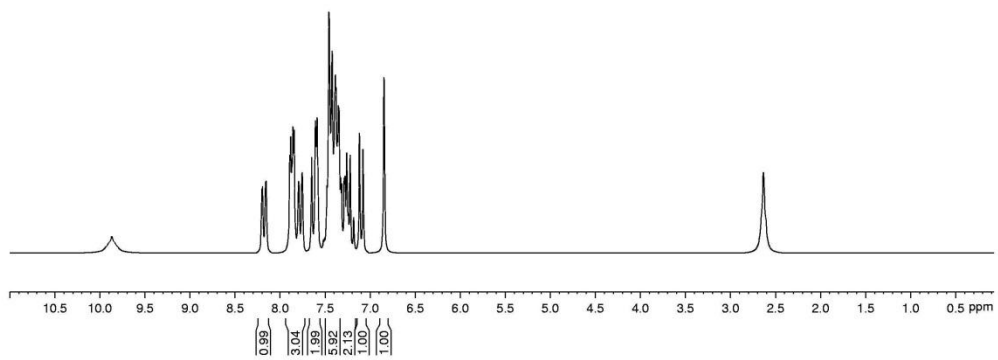



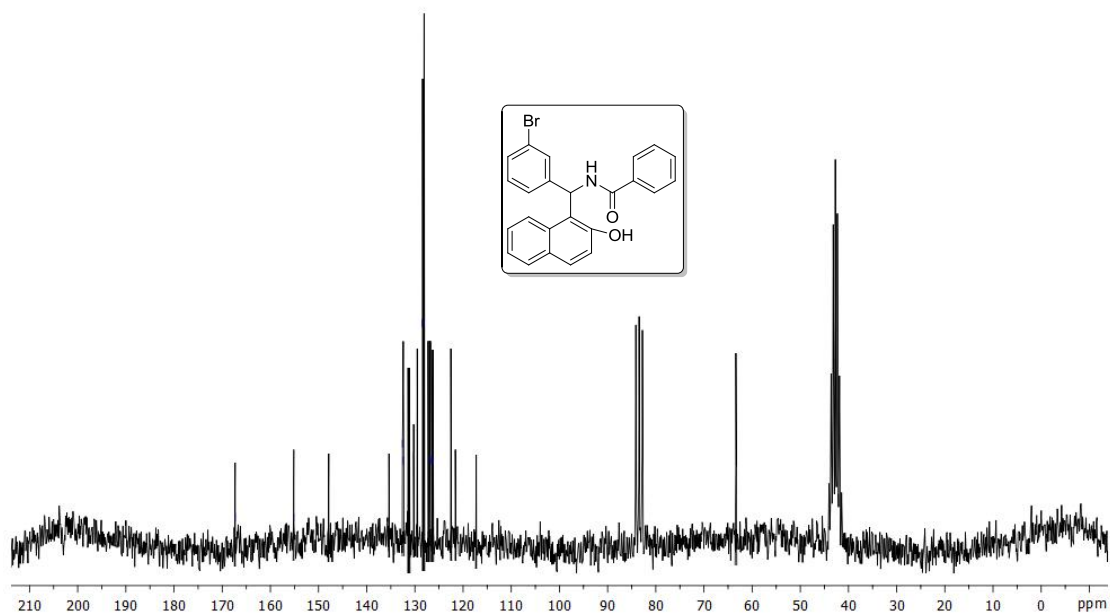

mkg-4n

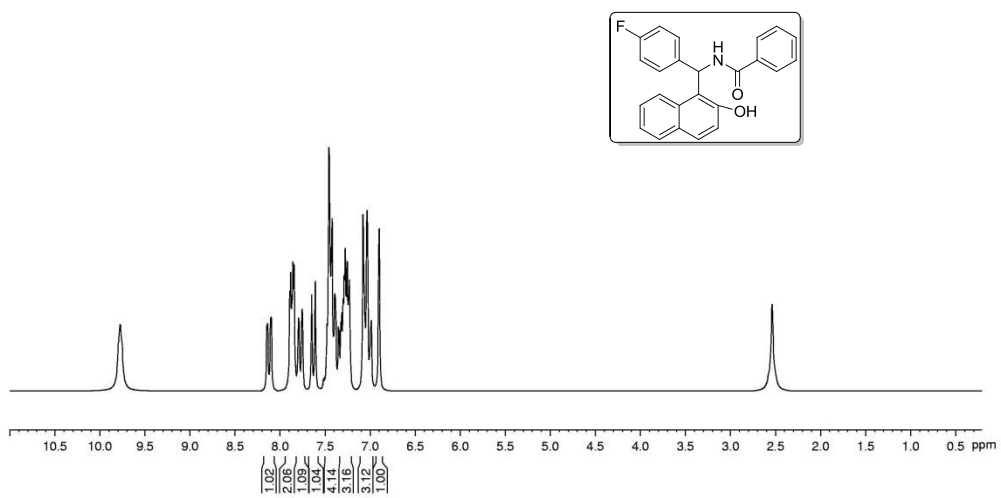

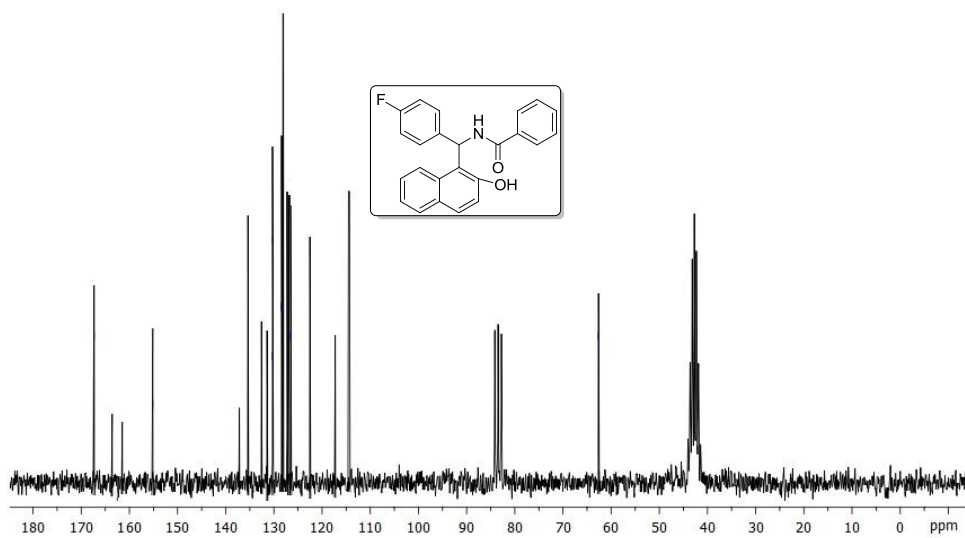

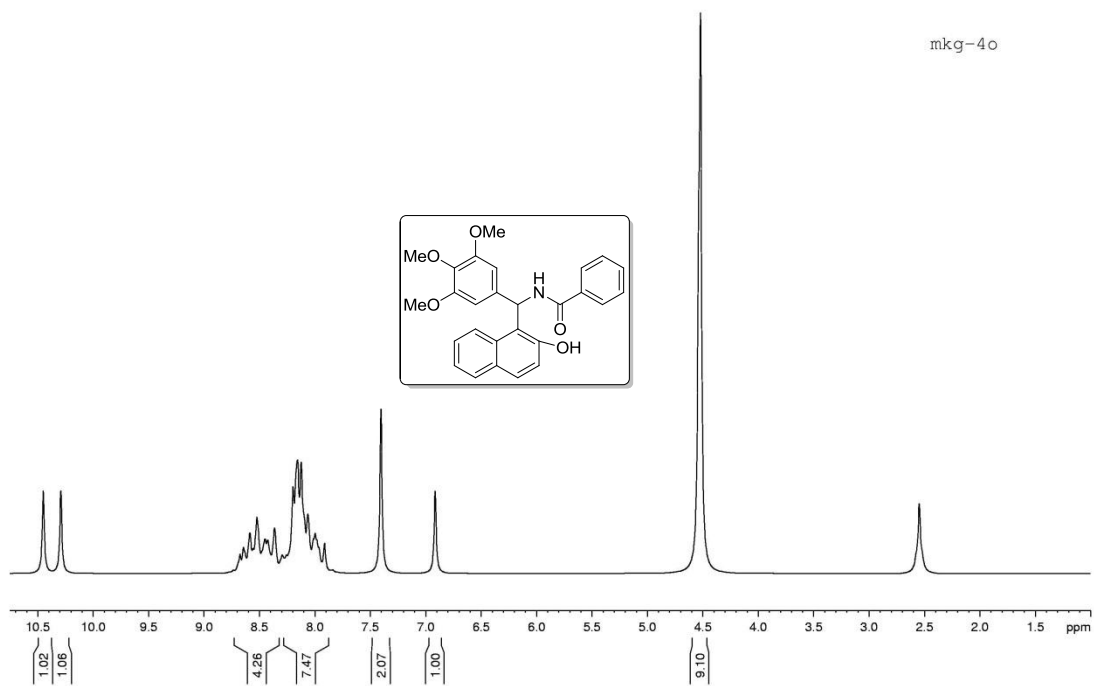

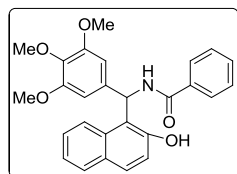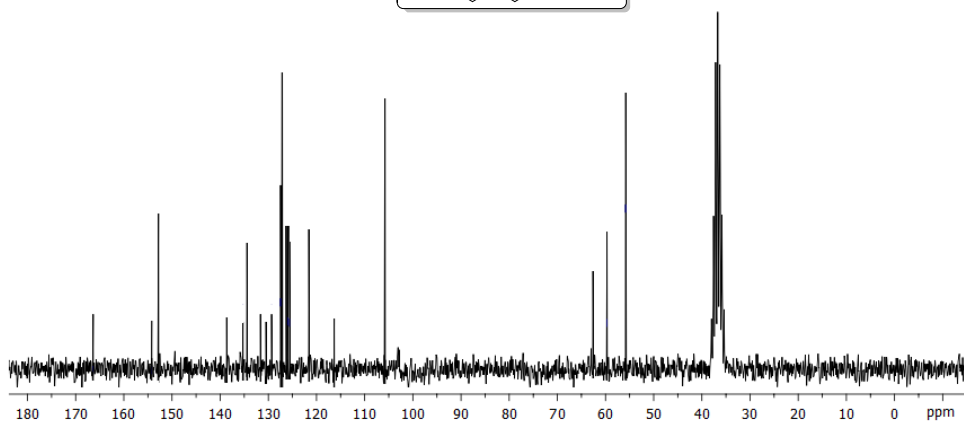

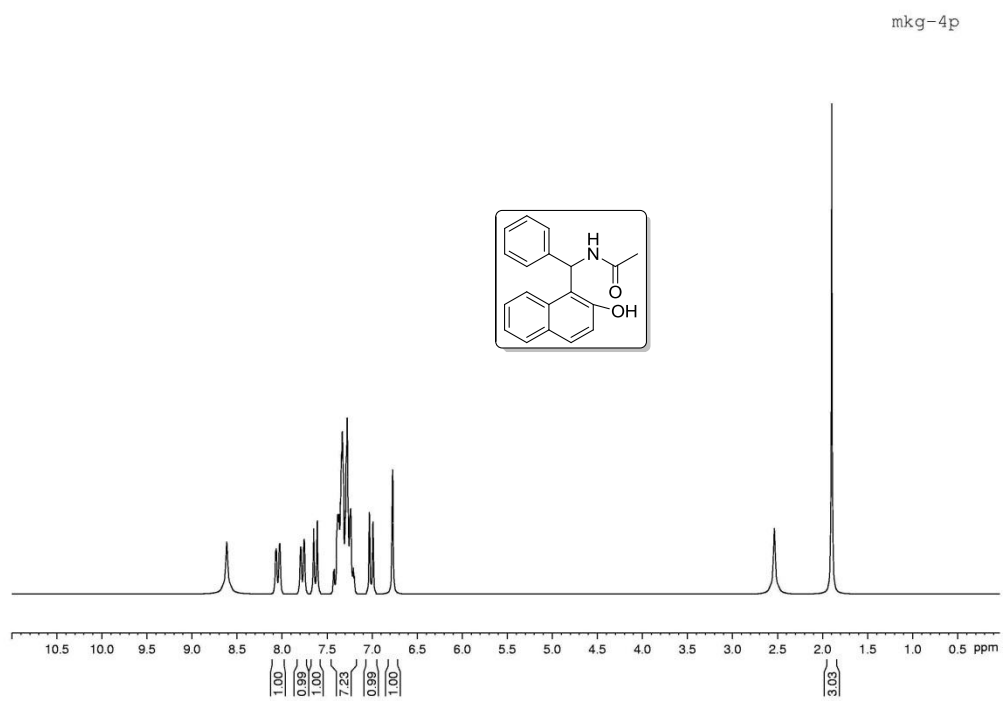

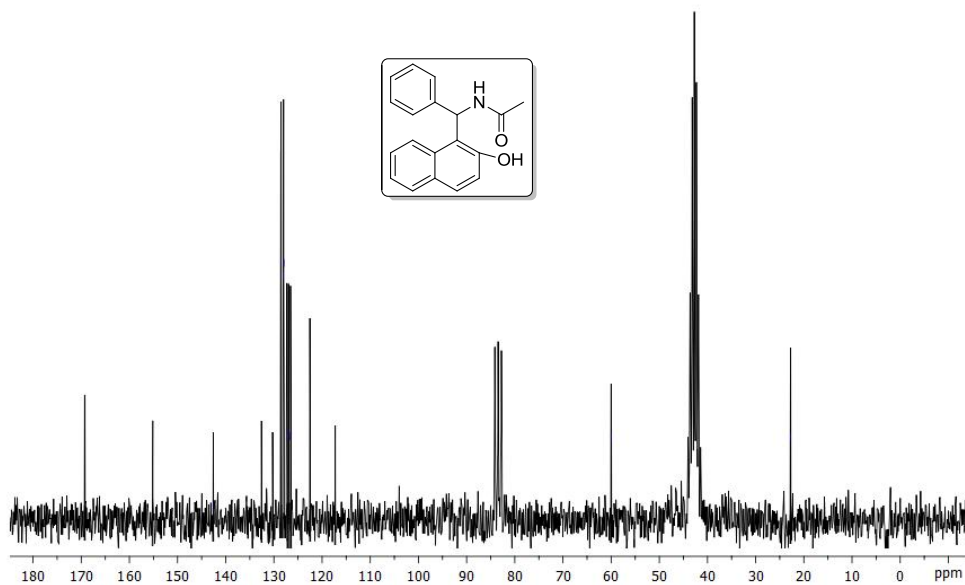

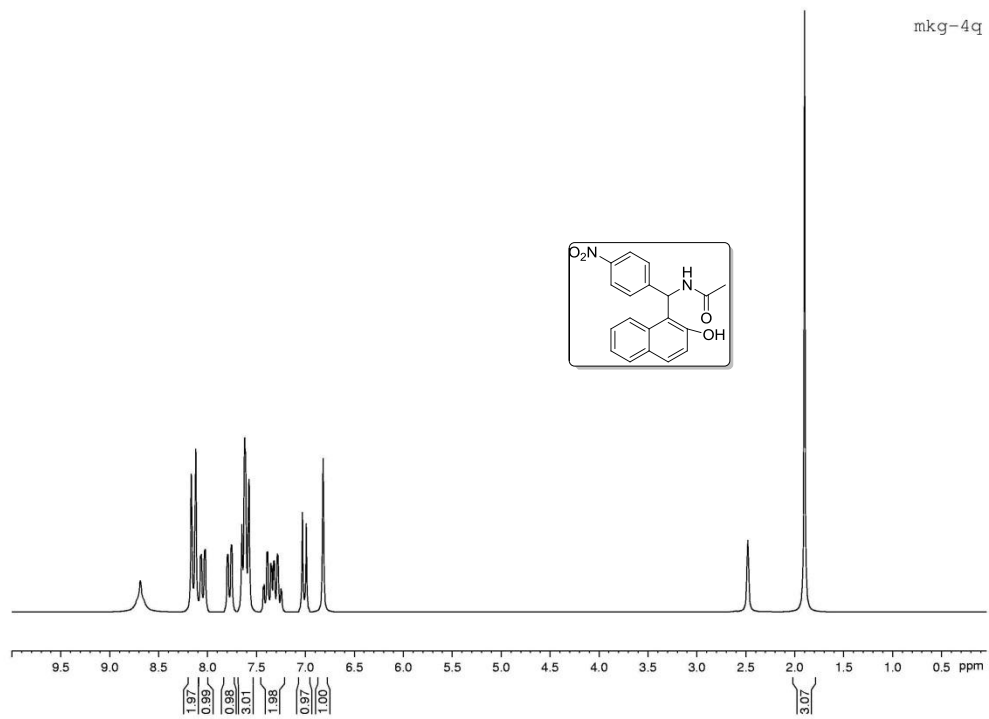



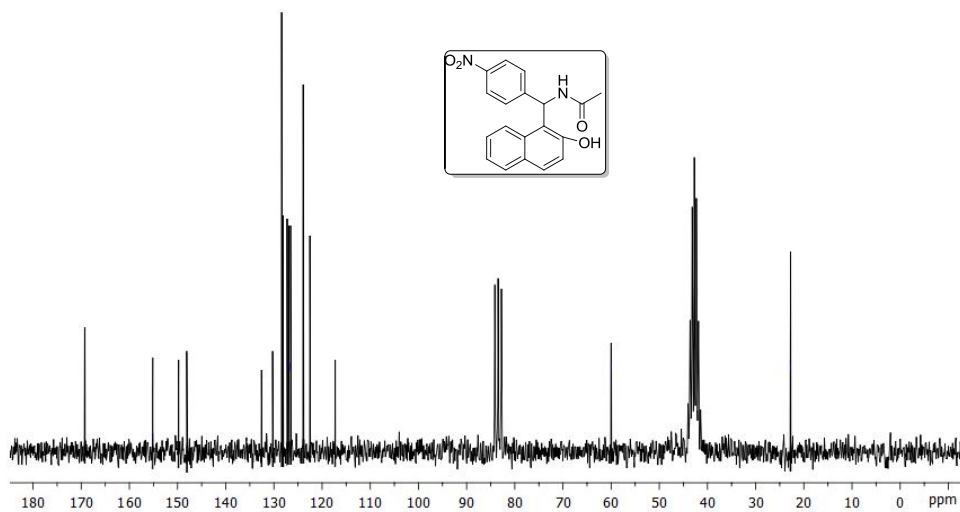

mkg-4r

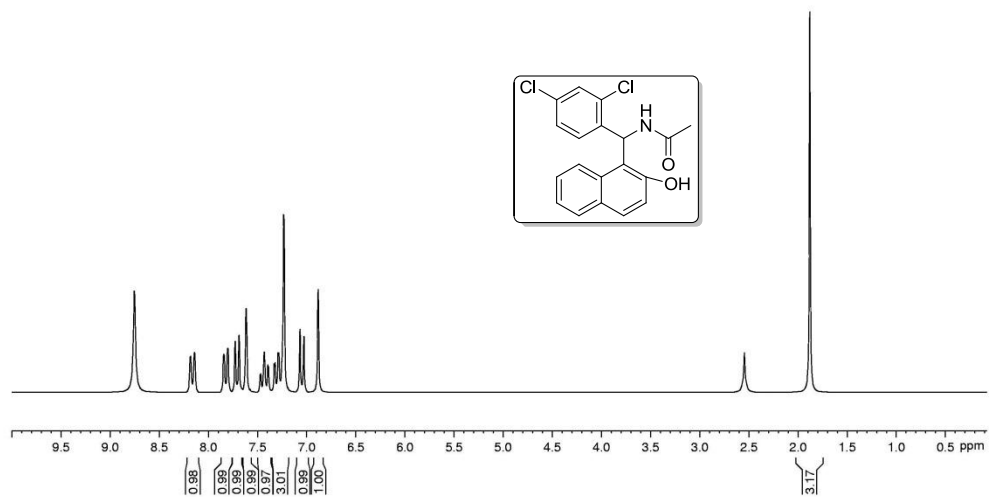

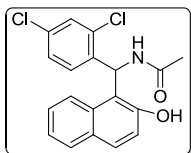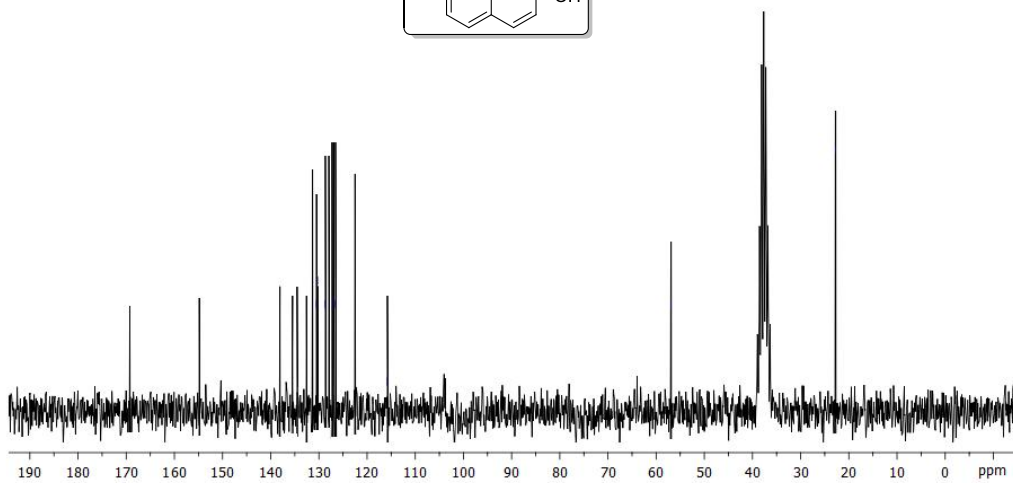

mkg-4s

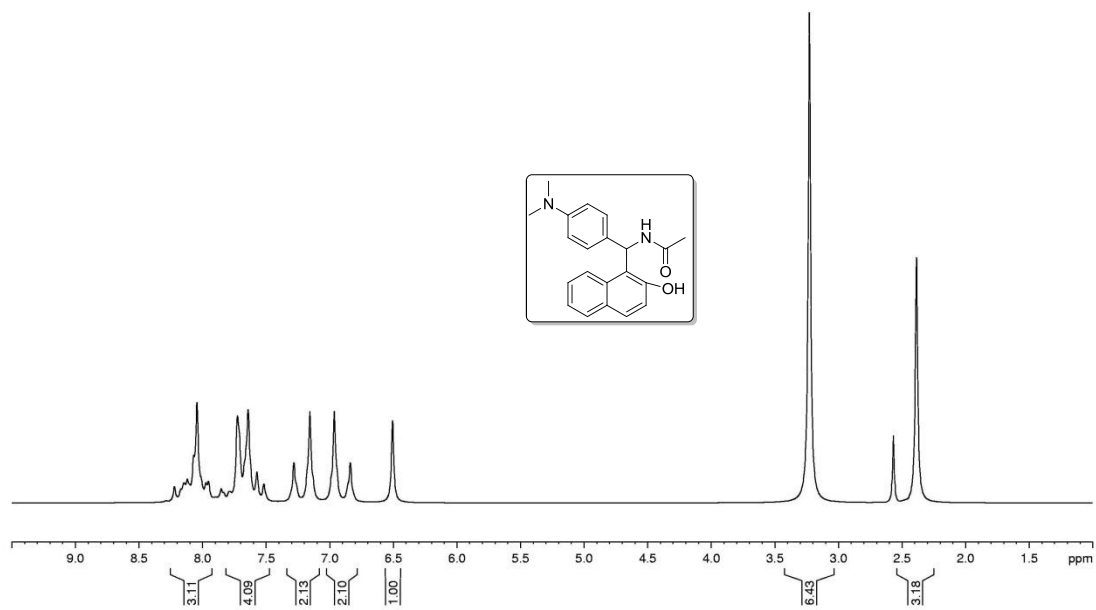

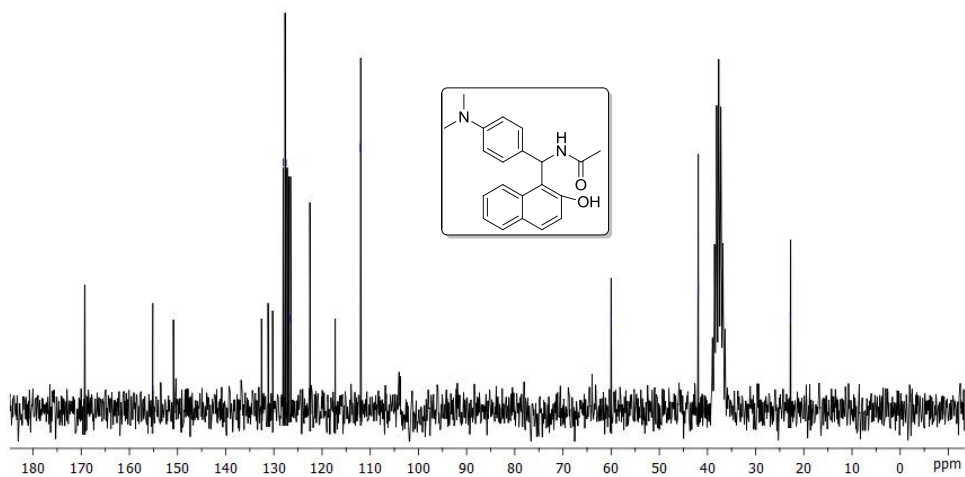

mkq-4t

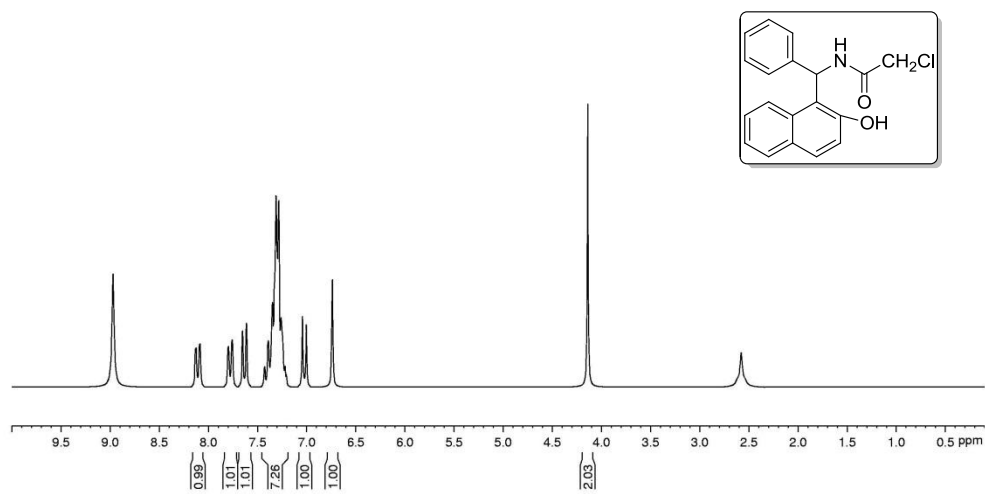

mkg-4u

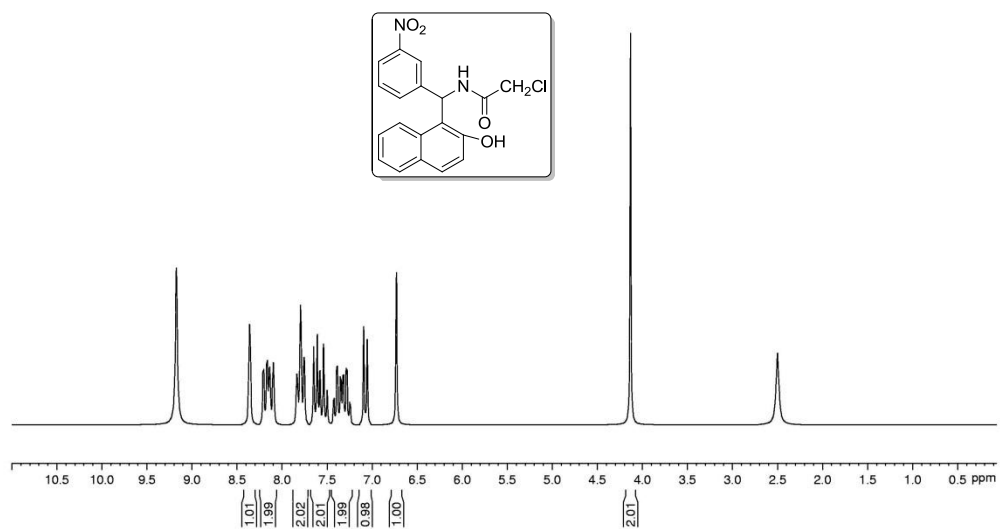

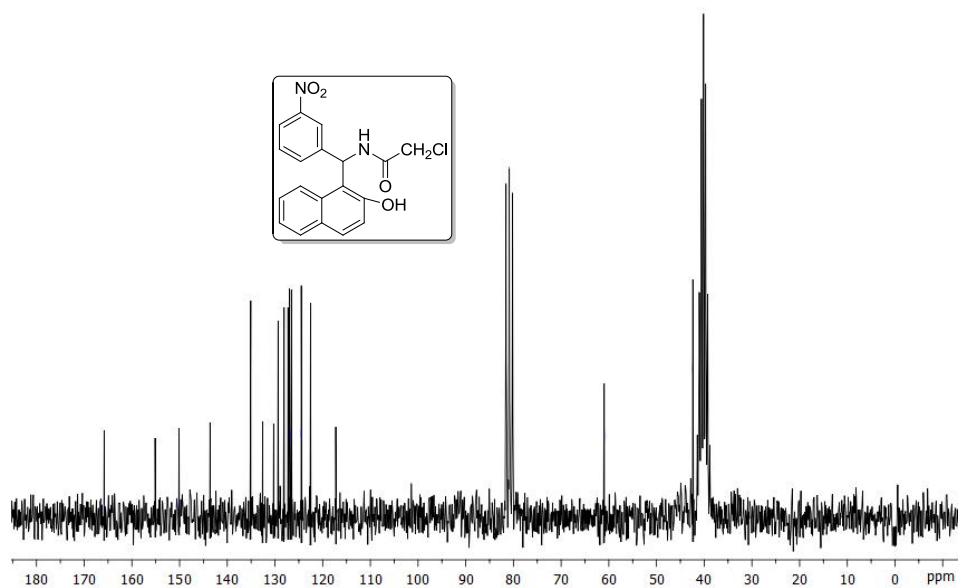



mkg-4v

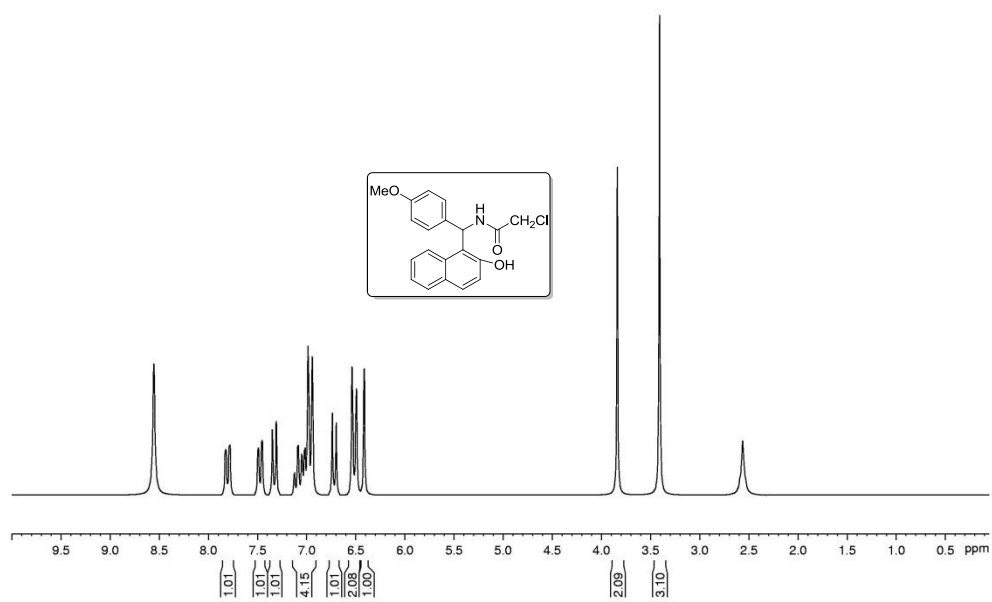

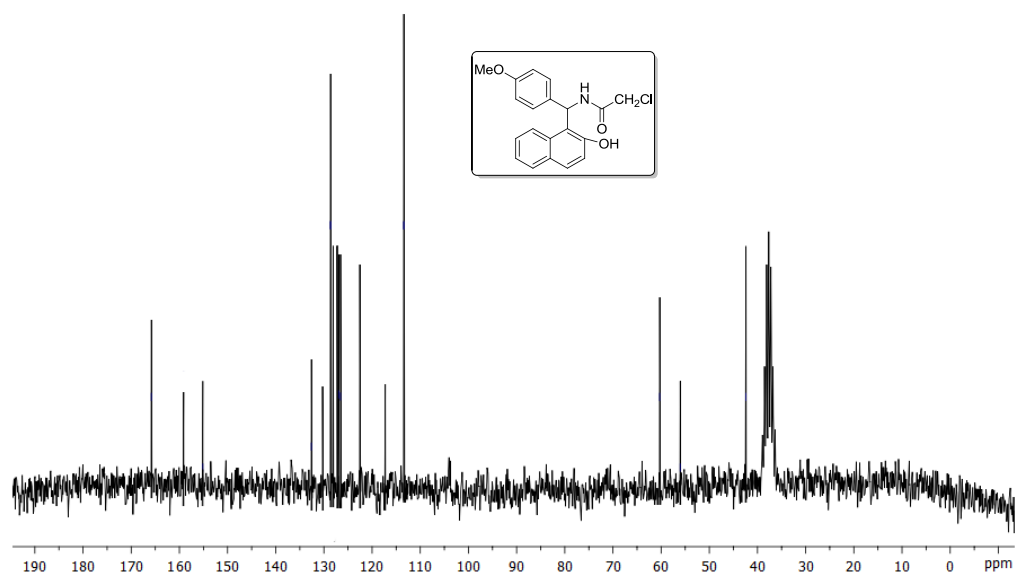

mkg-4w

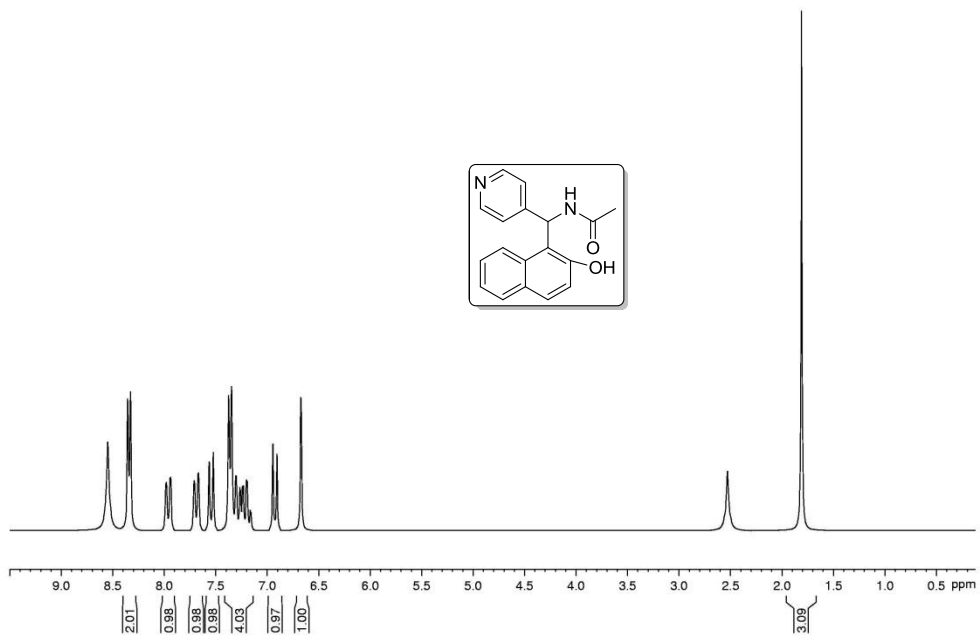

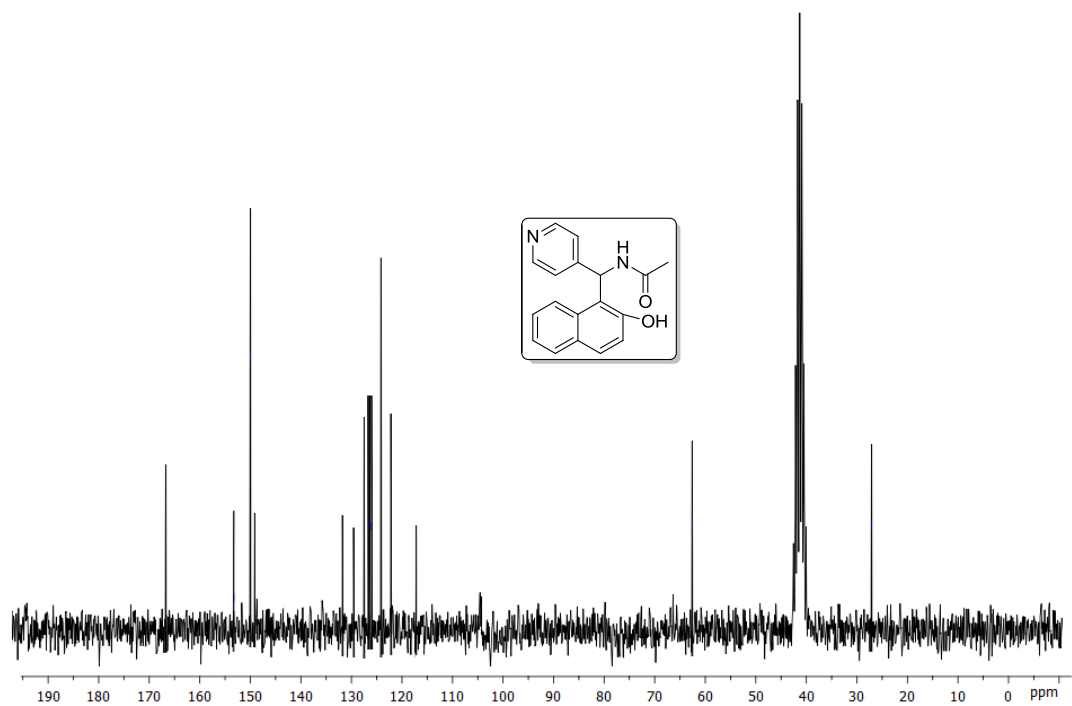

mkg-4x

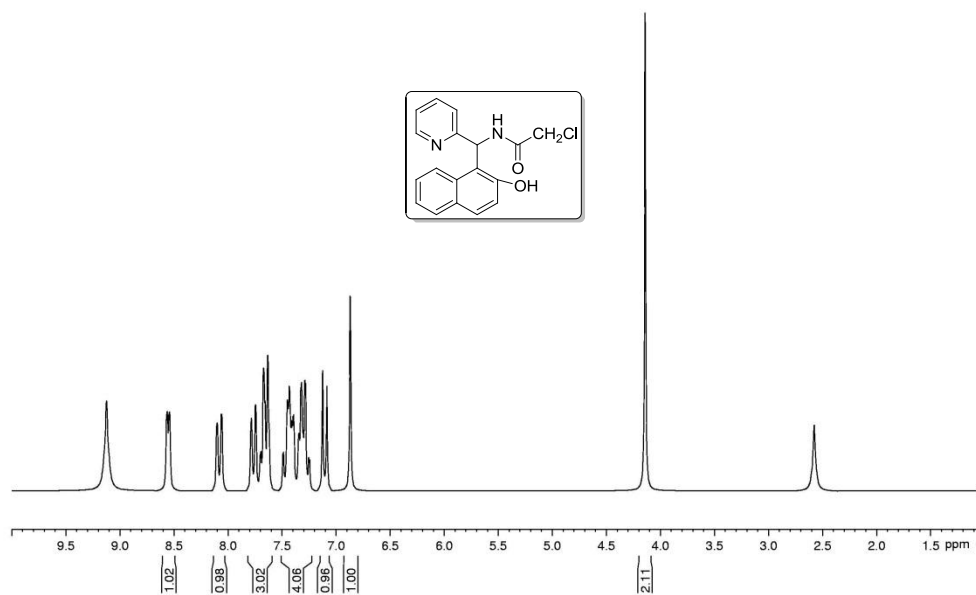

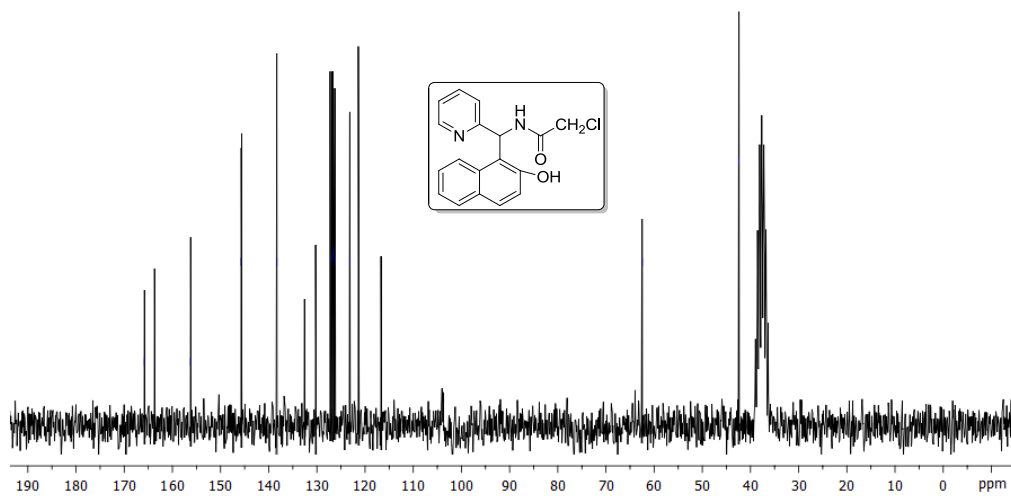

mkg-4y

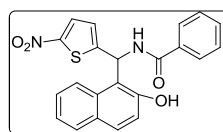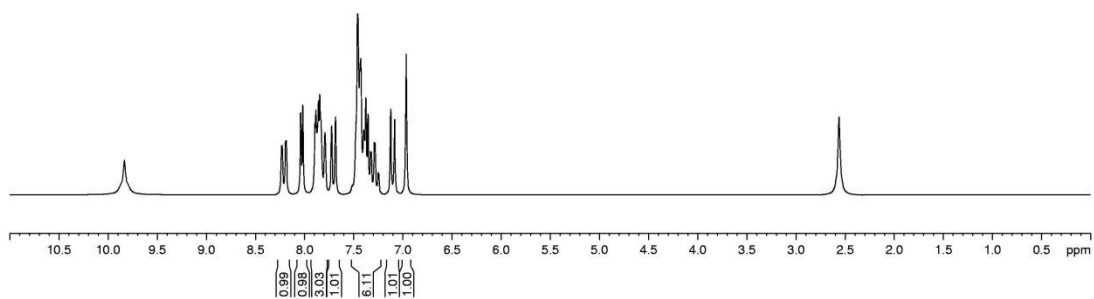

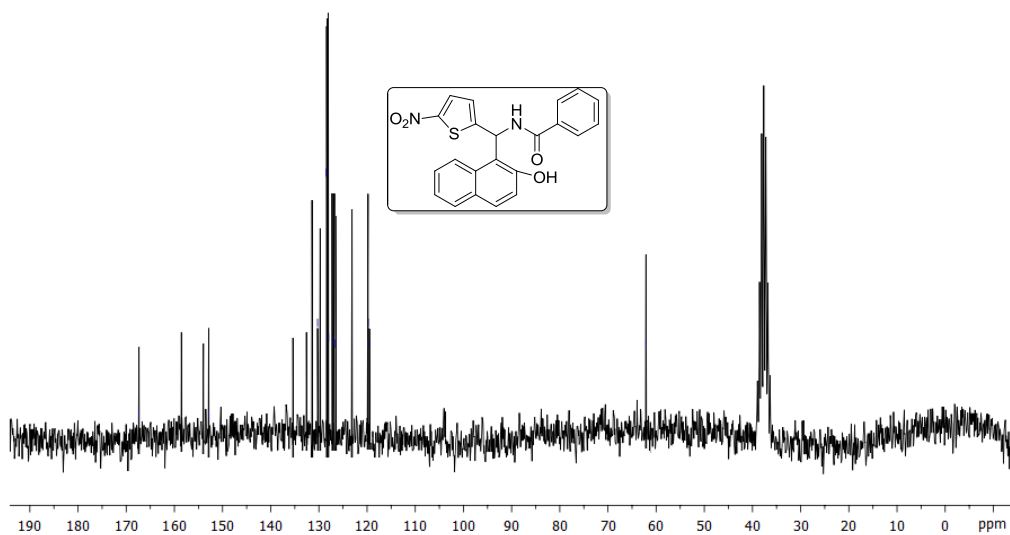

Supplement: c2ra20848b.pdf [file c2ra20848b.pdf]
